# Scoping the Line Up: A Comparison of Biomonitoring Methodologies for Surf Zone Fish Communities

Zachary Gold<sup>1</sup> ¶\*, McKenzie Q. Koch<sup>1</sup>¶, Nicholas K. Schooler<sup>2</sup>, Kyle A. Emery<sup>2</sup>, Jenifer E. Dugan<sup>2</sup>, Robert J. Miller<sup>2</sup>, Henry M. Page<sup>2</sup>, Donna M. Schroeder<sup>3</sup>, David M. Hubbard<sup>2</sup>, Jessica R. Madden<sup>2</sup>, Stephen G. Whitaker<sup>2,4</sup>, and Paul H. Barber<sup>1</sup>

<sup>1</sup>Department of Ecology and Evolutionary Biology, University of California Los Angeles, CA, USA

<sup>2</sup>Marine Science Institute, University of California Santa Barbara, CA, USA

<sup>3</sup>Bureau of Ocean Energy Management, Camarillo, CA, USA

<sup>4</sup>Channel Islands National Park, Ventura, CA, USA

\* Corresponding Author

Email: [zjgold@ucla.edu](mailto:zjgold@ucla.edu)

Phone: +1(310)-795-0020

¶ These authors contributed equally to this work.

## Abstract

Surf zones are highly dynamic marine ecosystems that are subject to increasing anthropogenic and climatic pressures, posing multiple challenges for biomonitoring. Traditional methods such as seines and hook and line surveys are often labor intensive, taxonomically biased, and can be physically hazardous. Emerging techniques, such as baited remote underwater video (BRUV) and environmental DNA (eDNA) are promising nondestructive tools for assessing marine biodiversity in surf zones of sandy beaches. Here we compare the relative performance of beach seines, BRUV, and eDNA in characterizing community composition of bony (teleost) and cartilaginous (elasmobranch) fishes of surf zones at 18 open coast sandy beaches in southern California. Seine and BRUV surveys captured overlapping, but distinct fish communities with 50% (18/36) of detected species shared. BRUV surveys more frequently detected larger species (e.g. sharks and rays) while seines more frequently detected one of the most abundant species, barred surfperch (*Amphistichus argenteus*). In contrast, eDNA metabarcoding captured 83.3% (30/36) of all fishes observed in seine and BRUV surveys plus 59 additional species, including 13 that frequent surf zone habitats. eDNA approaches showed significantly higher sensitivity than seine and BRUV methods and more consistently detected 29 of the 30 (96.7%) jointly observed species across beaches. The six species detected by BRUV/seines, but not eDNA either lacked reference sequences, were only resolved at higher taxonomic ranks (e.g. *Embiotocidae* surfperches), or were detected below occupancy thresholds. Low site-species overlap between methods limited comparisons of richness and abundance estimates, highlighting the challenge of comparing biomonitoring approaches. Despite potential for improvement, results overall demonstrate that eDNA can provide a cost-effective tool for long-term surf zone monitoring that

complements data from seine and BRUV surveys, allowing more comprehensive surveys of vertebrate diversity in surf zone habitats.

## Introduction

Sandy beaches and their adjacent surf zones comprise ~30% of the world's ice-free shoreline [1,2]. Surf zones provide critical ecosystem services, supporting local marine biodiversity through the provisioning of forage habitat, refuge from predators, spawning sites, and nurseries for commercially and recreationally important fish species [2–5]. Furthermore, sandy beaches and surf zones are important areas for recreation and tourism [3,6,7]. In California alone, the value of sandy beach ecosystem services in 2017 was estimated at \$25.9 billion annually [6,8,9].

Despite their tremendous societal and ecological value, our understanding of the status, and spatial and temporal dynamics of surf zone fish communities in southern California and around the world is lacking [1], and sandy beaches and surf zones are rarely included in conservation management plans [10]. Sandy beaches and associated surf zone biological communities face both local and global anthropogenic stressors that threaten their biodiversity and ecosystem function [11]. Sea-level rise coupled with coastal armoring is contributing to coastal squeeze, compressing or eliminating sandy beaches and altering surf zone habitats [12–15]. Coastal urban development and engineering are increasing erosion along shorelines, increasing turbidity and altering surf zone characteristics [16–18]. Compounding these stressors, pollutants from stormwater, sewage, oil spills, and agricultural runoff often spill directly into surf zone habitats [11]. As urban development and climate change continues to impact these important coastal ecosystems, our ability to effectively manage sandy beaches hinges on accurate assessments and monitoring of the species and communities that depend on them [11,19].

Traditional methods for monitoring surf zone ecosystems are based on surveys using nets, such as seines or bottom trawls, or hook and line fishing to capture surf zone fish [1,3,20]. Net, and hook and line surveys are advantageous as they can provide detailed information on size, sex, and age structure of fish populations, and are not influenced by poor underwater visibility. However, these capture surveys have known biases that limit their reliability and repeatability. Hook and line fishing surveys are often species-specific due to the choice of tackle and bait, and observer skill affects capture rates [21]. Wave and weather conditions can affect seine surveys by reducing the capture efficiency of nets and creating hazards to researchers in heavy surf (Table 1). Seines are also sensitive to slight variation in mesh size, width of opening, and speed of implementation, impacting repeatability and comparability of results [10,22]. Seines are also less effective for sampling large, fast-moving species [23,24] as well as small benthic fishes, such as flatfish (Families Pleuronectidae and Paralichthyidae), that pass through or under the nets. In addition, both these techniques are highly labor-intensive, and can be destructive, often injuring or killing captured specimens [25] (Table 1).

**Table 1. Comparisons of Survey Methods**

| <b><i>Metric</i></b>                       | <b>Beach Seine</b>                                       | <b>BRUV</b>                       | <b>eDNA</b>                                                                                             |
|--------------------------------------------|----------------------------------------------------------|-----------------------------------|---------------------------------------------------------------------------------------------------------|
| <b><i>Team size needed</i></b>             | 4-6                                                      | 2                                 | 2                                                                                                       |
| <b><i>Set up and Field time</i></b>        | 20 minutes per seine, 20-85 minutes to measure & release | 1.5 to 2.0 hours                  | 20 minutes                                                                                              |
| <b><i>Field Gear required</i></b>          | Seine, poles, lines                                      | Weighted video rigs, bait         | Sampling bags, filters, ice chest                                                                       |
| <b><i>Field Sample processing</i></b>      | Minimal, gear clean up and repair                        | Minimal, gear clean up and repair | ~1.5 hours for gravity filtering and preserving samples                                                 |
| <b><i>Post-Field Sample Processing</i></b> | None                                                     | 1.5-3.0 hours per video           | 12-24 hours per sample (DNA extraction, PCR, Library preparation, sequencing), but can be automated and |

|                                         |                                              |                                 |                                                                         |
|-----------------------------------------|----------------------------------------------|---------------------------------|-------------------------------------------------------------------------|
|                                         |                                              |                                 | optimized for high throughput                                           |
| <b><i>Sample Archiving</i></b>          | No – fish released                           | Yes – video record              | Yes – DNA extractions archived & sequence record                        |
| <b><i>Abundance</i></b>                 | Relative                                     | Relative                        | Relative (needs ground truthing)                                        |
| <b><i>Size and age distribution</i></b> | Yes                                          | No                              | No                                                                      |
| <b><i>Injury/mortality of fish</i></b>  | A small percentage of catch                  | No                              | No                                                                      |
| <b><i>Effect of sea conditions</i></b>  | Significant- affects net behavior and safety | Significant- affects visibility | Wider tolerance but unknown effects on spatial and temporal variability |

Alternative surf zone biomonitoring approaches rely on visual surveys, either via SCUBA or snorkel transects or baited remote underwater video (BRUV) units [1,26,27]. BRUVs are increasingly used to overcome diver avoidance behavior [20,28–30], instead employing baited video cameras that record fish passing through the field of view, allowing for non-invasive measurements of fish diversity, abundance, and behavior. However, BRUV surveys also have biases that limit their reliability and repeatability (Table 1). Large waves, inclement weather, light conditions, and drifting macrophytes, can all reduce visibility and impair species identification and detection [31,32]. BRUV methods are also sensitive to bait choice, length and location of deployment [10,22], may not attract planktotrophic and herbivorous fish that are not attracted to the bait, and are poor at detecting cryptic species [22]. Moreover, they are challenging to deploy by kayak or swimming in the surf zone, and can require processing of hundreds of hours of underwater video [27]. Together, these limitations affect the reliability and effectiveness of visual monitoring approaches of surf zone fish communities, highlighting the need for new approaches.

A promising new approach for surveying the diversity of coastal marine ecosystems is environmental DNA (eDNA) metabarcoding [33,34]. eDNA refers to the collection, capture, sequencing, and identification of DNA from recently dissociated cells of organisms inhabiting a particular ecosystem [35,36]. Studies indicate that eDNA metabarcoding is highly sensitive and provides an accurate, practical, and cost-effective method of monitoring marine biodiversity [37–41].

Studies of eDNA highlight some key advantages relative to seining and BRUVs (Table 1). In particular, eDNA identifies a broad diversity of marine life, frequently detecting more species than other methods [42–45], including cryptic, rare, invasive, and endangered species [46–50], and is effective across a variety of marine ecosystems, including coral reefs [51,52], kelp forests [53], estuaries [31,54], and coastal oceans [37,55,56]. eDNA is largely independent of developmental stage, allowing for the detection of larval and juvenile life stages, identifying potential nursery grounds [34]. In addition, eDNA samples are simple to collect, encouraging citizen and community science, and are also cost effective, permitting increased sampling efforts across both time and space [34,57–59].

Yet eDNA also has limitations. For example, the need for molecular expertise and laboratory space to process samples may limit some research groups and monitoring agencies where such resources are not already available [41]. Additionally, eDNA does not provide key information needed for fishery and stock assessments (e.g., size, age, sex), and it is unclear whether eDNA results accurately reflect the relative abundance of marine species [31,40,60,61].

There are also unresolved questions about the fate and transport of eDNA, particularly in highly dynamic coastal marine ecosystems. For example, previous studies report spatial resolution of eDNA in nearshore marine environments is on the scale of 50-1000 m [53,62–65]

and temporal resolution is on the scale of hours to days [66–68], complicating the ecological interpretation of detected community assemblages [62,68–73]. However, these studies were not conducted in surf zone ecosystems which are strongly affected by wave driven longshore transport and nearshore currents with higher velocities (e.g., rip currents) and tides compared to the subtidal ecosystems previously studied, potentially integrating ecological signatures over greater space and time, and mixing species detections across ecosystems [1].

Although eDNA and BRUV surveys hold promise for monitoring surf zone habitats, evaluating how well these methods perform compared to traditional seine surveys and each other is a crucial information gap [27,74,75]; to date, only two studies [73,76] employed eDNA to assess fish biodiversity in surf zones habitats. To address this gap, we compared the ability of seine, BRUV, and eDNA methods to describe surf zone fish communities using a series of surveys where we simultaneously employed all three methodologies at 18 open coast surf zones associated with beaches in southern California. We compared these results to assess how the different survey methods performed in surf zone habitats, information critical to resource managers charged with monitoring these important coastal ecosystems.

## Methods

### *Study Sites*

To compare the effectiveness of seine, BRUV, and eDNA survey techniques for monitoring surf zone bony (teleost) and cartilaginous (elasmobranch) fish communities, we deployed the three survey techniques contemporaneously at 18 sandy beach sites across southern California, USA (Figure 1; Table S1); 14 on the California Channel Islands and 4 on the mainland. These represent novel fish community surveys for all but three of the mainland sites, providing

important baseline data for fish assemblages. To maximize comparability, we surveyed surf zones using all three methods at each location on the same day using the methods described below. All surveys were conducted between August 15, 2018 and November 2, 2018. At one site, Soledad beach, on Santa Rosa Island, we were unable to conduct the BRUV surveys due to hazardous surf conditions.

**Fig 1. Site Map. A) The entire study region. B) Northern Channel Islands. C)**

**Catalina Island**

Map of the (A) study region showing mainland sites, (B) Northern Channel Islands sites, (C) Catalina Island sites on the coast of southern California, USA. Black dots and numbers correspond to site names. 1– Dangermond, 2 – R Beach, 3 – Santa Claus, 4 – Santa Monica, 5 – Cuyler Harbor, 6 – Sandy Point, 7 – Soledad, 8 – Bechers Bay, 9 – Water Canyon, 10 – Southeast Anchorage, 11 – Ford Point, 12 – China Camp, 13 – Forney Cove, 14 – Christy Beach, 15 – Coches Prietos, 16 – Emerald Bay, 17 – Little Harbor, 18 – Ben Weston.

*Beach seine surveys*

Beach seine surveys were employed using methods modified from the California Department of Fish and Wildlife (Monterey, CA, USA) [20] using a 15.3 m (50 ft) x 1.8 m (6 ft) seine net (10 mm knotless nylon mesh, 2 m poles, 20 m leader ropes) with a bag, floats, and weighted lead line. At each site, we conducted seine hauls in the surf zone at four locations spaced haphazardly along the beach. For each seine haul, two researchers opened the beach seine parallel to shore in approximately 1.5 m of water. Keeping the weighted line flush with the bottom, we dragged the seine perpendicular to the shoreline until reaching the beach. Fish were then immediately removed from the seine, placed in aerated 1 m x 0.5 m x 0.5 m live wells, identified, enumerated, measured (total and standard length) on glazed (smooth) fish boards, and released alive at the site of capture in accordance University of California Santa Barbara's Institutional Animal Care and Use (IACUC) protocol #943. Any fish that appear to be severely injured, moribund, or that did not recover from the stress of trapping were euthanized using Tricaine methanesulfonate (MS-

222), a non-inhaled agents approved in the “AVMA Guidelines for the Euthanasia of Animals: 2013 Edition” for finfish [77].

### *Baited remote underwater video (BRUV) surveys*

We conducted BRUV surveys following methods modified from Vargas-Fonseca et al. [78] and Borland et al. [26]. Each BRUV consisted of a GoPro Hero2 camera (GoPro Inc., San Mateo, California, USA, 2020) mounted on a five kg weight with a line and float attached for ease of retrieval. We then attached a bait bag containing ~152 g of frozen squid (*Loligo* sp.) to the weight with a PVC pipe, positioning it one meter in front of the camera. Snorkelers deployed three haphazardly spaced BRUV units along the outer edge of the surf zone at a depth of greater than two meters within two hours of low tide after conducting sein hauls, except for at sites where sufficient personnel allowed for concurrent sampling. We deployed each BRUV for one hour, producing three hours of video per beach. We reviewed videos to determine fish abundance, species richness, and community composition, using the *MaxN* statistic, the maximum number of individuals of one species in one frame during the hour-long footage [79].

### *Environmental DNA (eDNA) surveys*

We collected three replicate 0.5 L samples of seawater (herein referred to as sample replicates) using sterile collapsible enteral feeding bags. We then gravity filtered samples through 0.2 µm Sterivex filters following the methods of Gold et al. [80] (See Supplement for detailed description), storing filters at -20°C prior to extraction via a modified Qiagen DNAeasy Blood and Tissue kit (Qiagen Inc., Germantown, MD, USA) [81]. We amplified eDNA samples in triplicate using both *I2S* MiFish Universal teleost (MiFish-U) and elasmobranch (MiFish-E)

primer sets [82], and then prepared sequencing libraries preparation followed Gold et al. [80] using Nextera Unique Dual Indices (Illumina, San Diego, CA, USA). We pooled all samples in equimolar concentrations by primer set, resulting in a MiFish-U and a MiFish-E library which were separately sequenced on NextSeq PE 2 x 150 bp mid-output at the Technology Center for Genomics & Bioinformatics at the University of California – Los Angeles (UCLA) with 20% PhiX added to both sequencing runs.

# *eDNA bioinformatics*

We processed the resulting eDNA metabarcoding sequences using the *Anacapa Toolkit* (version 1) [83], conducting quality control, amplicon sequence variant (ASV) parsing, and taxonomic assignment. Taxonomy was assigned using a curated reference database composed of fishes from the California Current Large Marine Ecosystem following Gold et al. [80] (See detailed description in Supplement). The resulting taxonomic tables were transferred into *R* for further processing [84]. We employed a multifaceted decontamination approach developed by Kelly et al. (2018) to remove field contamination, lab contamination, and index hopping [71,85–87]. We then summed the total reads of ASVs by assigned taxonomy including multiple ASVs from the two MiFish markers employed. From these processes, we obtained decontaminated eDNA species-by-sample community tables with counts of total sequence reads.

We transformed the eDNA read counts into eDNA index scores according to Kelly et al. [71], which normalizes the read count per technical PCR replicate per species. This index was computed by first calculating the relative abundance of each species in each technical PCR replicate. The relative abundance was then divided by the maximum relative abundance for a

given species across all samples, yielding the eDNA index score, which ranges from 0 to 1 and allows for comparisons of relative abundance for specific taxa across samples.

# *Data analysis*

To explore the relative efficacy of seines, BRUV, and eDNA surveys for characterizing surf zone fish communities, we compared the total number of teleost and elasmobranch species identified by each method using the *phyloseq* (version 1.28.0) and *vegan* packages (version 2.5-7) [88,89] in *R* (version 3.6.1, R Core Team 2020). Comparisons were made in two ways: 1) all detected fish taxa and 2) only surf zone fish taxa. Surf zone taxa were determined using habitat descriptions from FishBase.org and the literature [3,90,91] (Table S2). We determined and visualized the overlapping and unique fish species detected by each survey method across all 18 sites using the *VennDiagram* package (version 1.6.20) [92], comparing species richness of each method using Analysis of Variance (ANOVA) and post-hoc Tukey tests using the *vegan* package [89].

To examine survey method performance on a site-by-site basis, we calculated and compared the overlap of presence/absence site-species detections [84,93,94]. Here, we define a site-species detection as the detection of a species at a given site (e.g., Top smelt detected at Bechers Bay). Comparisons of site-species detections were conducted for both the surf zone fishes and all fishes, observed by seine, BRUV, and eDNA, respectively. We estimated sample coverage, the fraction of the total incidence probabilities of the discovered species for a set of sampling units, from rarefaction and extrapolation models for species richness (Hill number  $q=0$ ) for each method using the *iNext* package (version 2.0.20) [95].

To determine whether the presence or absence of a species is a true reflection of biological reality or due to issues in the sampling process [96,97], we also conducted a site-occupancy analysis of species detections at each site following the methods of Chambert et al. [87] as implemented by Kelly et al. [98]. The binomial model yields the likelihood that a taxon detected is truly present in the sample. The model, implemented in Stan for R (version 2.2.12; [100]), depends upon three parameters: 1) the commonness of a taxon in the dataset (denoted  $P_{si}$ ), 2) the probability of a detection given that the taxon is truly present (true positive detection; denoted  $P_{11}$ ), and 3) the probability of a detection given that the taxon was not truly present (false positive; denoted  $P_{10}$ ). The probability of occurrence function used was the following:

$$\text{Probability of Occurrence} = \frac{p_{si} * p_{11}^N * (1 - p_{11})^{K-N}}{p_{si} * p_{11}^N * (1 - p_{11})^{K-N} + (1 - p_{si}) * p_{10}^N * (1 - p_{10})^{K-N}}$$

Where K is the number of samples taken within a site and N is the number of species detections within a site (See Supplemental methods for detailed description). For each species we calculated the number of detections out of the number of replicate surveys taken at each site. The occurrence of either a single sequence or single individual for one species in a given replicate was treated as a detection at that site.

In addition to probability of occurrence we also calculated the mean sensitivity, the proportion of true positive detections correctly identified as positive using the following equation for each species:

$$\text{Sensitivity} = \frac{p_{11}}{p_{11} + p_{10}}$$

We also calculated the mean specificity, the proportion of true negative detections correctly identified as negative, using the following equation for each species:

$$Specificity = \frac{1 - p_{10}}{(1 - p_{10}) + (1 - p_{11})}$$

We then compared the probability of occupancy, mean sensitivity, and mean specificity of each method across all species detected [101]. We further compared differences in the eDNA-derived probability of occurrence of surf zone and non-surf zone associated species to test if occupancy rates are a potential function of transport dynamics.

To analyze differences in the composition of surf zone fish detected among methods and across sites, we conducted a PERMANOVA and companion multivariate homogeneity of group dispersions on Jaccard-Binary dissimilarity indices based on presence/absence data using the *adonis* and *betadisper* functions in the *vegan* package [89]. The PERMANOVA was conducted using the following model:

$$Detection \sim Survey\ Method + Site.$$

We excluded the Soledad site on Santa Rosa Island given the lack of a BRUV survey. We further visualized community beta diversity among sampling methods using a constrained canonical analysis of principal components (CAP) through the *vegan* package [84,88].

Lastly, to assess the ability of eDNA to capture relative abundance, we compared mean eDNA index scores to both the average catch counts per seine as well as average *MaxN* counts per BRUV station using species-specific linear regressions. Similarly, we compared BRUV-derived average *MaxN* counts against average seine counts. We focused our analyses on species detected jointly by each method at three or more sites.

## Results

Our beach seine surveys captured a total of 1,359 individuals in 72 hauls across all sites (4 hauls per site). Seven of the 72 hauls produced 0 individuals. In total, seining detected 24 species of

fish from 24 genera, 13 families, and two classes (Table S3). On average, we captured 4.0 species ( $\pm 2.5$  standard deviation, range 0-9), and  $75.5 \pm 82.8$  individuals per site (range 0-325 individual fishes).

Our BRUV surveys detected a total of 1,114 individual fishes in 51 BRUV deployments (3 replicate deployments per site). In total, BRUV surveys detected 30 species, 30 genera, 21 families, and two classes (Table S4). An average of  $6.3 \pm 3.2$  species (range 2-16 species) and  $65.5 \pm 65.5$  total individuals (range 13-236 individuals) were recorded per site.

Sequencing of the 54 eDNA samples yielded a total of 4,839,336 MiFish elasmobranch reads and 16,835,503 MiFish teleost reads that passed the initial NextSeq quality controls across all samples. After decontamination and site occupancy modeling, we retained 3,638,292 reads and 908 ASVs from MiFish Elasmobranch primer set and 12,953,877 reads and 1,877 ASVs from MiFish Teleost primer set, representing 89 species of fish from 79 genera, 48 families, and two classes across sites. On average we observed  $34.4 \pm 12.3$  SD species per site (range 11-59 species) (Figure S1).

#### *Species assemblages characterized by each method*

We found variable agreement in the assemblages of species captured by each survey method across all 18 sites (Figures 2 & S2). Seine and BRUV captured distinct, but overlapping surf zone fish assemblages, sharing only 50% (18/36) of fishes species. Seine surveys detected 6 species of fishes not observed in BRUV surveys, including 2 species of croakers (Family Sciaenidae), 2 species of surfperches (Family Embiotocidae), and two planktotrophic coastal-pelagic species (families Clupeidae and Atherinidae). In contrast, BRUV surveys detected 12

fish species not observed in seines, including 3 species of elasmobranchs, 6 species of rocky reef associated species, and 2 coastal-pelagic predator species.

## **Fig 2. Venn Diagram of eDNA, Seine, and BRUV Species Detections.**

Environmental DNA methods captured the majority (30/36) of fish species detected by both BRUV and seine surveys, only failing to identify six fish species found in the other two survey methods. In addition eDNA identified 59 additional fish species missed by seine and BRUV methods. In contrast, BRUV and seine surveys only captured 50% of species detected by both methods, showing strong difference in the species detected by each method. This was largely driven by the unique detection of elasmobranchs as well as nearshore pelagic and rocky reef carnivorous fishes in BRUV surveys compared to the unique detection of surfperches (Family Embiotocidae), grunts (Family Sciaenidae), and planktivorous nearshore pelagic species in seine surveys.

In contrast, eDNA detected the majority (83.3%, 30 out of 36) of species found in seine and BRUV surveys (Figure 2). Similarly, when only focusing on surf zone fish (Table S2), eDNA detected 83.3% (25 out of 30) of species detected in seine and BRUV surveys (Figure S2). eDNA methods failed to detect six species found in the seine and BRUV surveys including three species of surfperch, the most abundant and widespread family (*Embiotocidae*) detected in the seine surveys. Undetected species include the walleye surfperch (*Hyperprosopon argenteum*), silver surfperch (*Hyperprosopon ellipticum*), barred surfperch (*Amphistichus argenteus*), white seabass (*Atractoscion nobilis*), kelp pipefish (*Syngnathus californiensis*), and the soupfin shark (*Galeorhinus galeus*). However, eDNA surveys detected 59 fish species not detected in seine or BRUV surveys (Table S5 & S6), including 13 surf-zone associated species and 46 species more typically associated with reef and pelagic habitats (Table S2). Thus, eDNA had high overlap with both BRUV and seine surveys in addition to capturing additional surf zone and nearshore marine fishes.

Composition of detected taxa varied significantly among survey methods (Figures 3 and S3; CAP ANOVA  $p < 0.001$ ) driven by biases in detection of specific taxa. Seines and BRUVs

commonly detected barred surfperch (*Amphistichus argenteus*), whereas eDNA only could not resolve surfperches below family level. Similarly, eDNA and BRUV surveys more frequently detected leopard shark (*T. semifasciata*), California bat ray (*M. californica*), and kelp bass (*Paralabrax clathratus*) compared to seine surveys. In contrast, eDNA detected many more species than BRUVs or seines, including opaleye (*Girella nigricans*), Pacific sardine (*Sardinops sagax*), northern anchovy (*Engraulis mordax*), giant kelpfish (*Heterostichus rostratus*), California grunion (*Leuresthes tenuis*), dwarf perch (*Micrometrus minimus*), and black surfperch (*Embiotica jacksoni*) (Figure 3).

### Fig 3. Constrained Analysis of Principal Components

Constrained Analysis of Principal Components (CAP) analysis was conducted on Jaccard binary dissimilarities of fish assemblages of all species detected across surveys. Survey method explained 41.5% of the total variation observed in the composition of detected taxa while site explained an additional 28.8% (PERMANOVA  $p < 0.0001$ ). We found no significant difference in homogeneity of dispersions across sites (betadisper  $> 0.05$ ). BRUV and eDNA approaches more frequently detected leopard sharks (*Triakis semifasciata*) and California bat ray (*Myliobatis californica*) compared to seine surveys. Both seine and BRUV surveys detected Barred surfperch (*Amphistichus argenteus*) while eDNA methods could only achieve family level resolution for this taxon. eDNA approaches more consistently detected opaleye (*Girella nigricans*), northern anchovy (*Engraulis mordax*), giant kelpfish (*Heterostichus rostratus*), and dwarf perch (*Micrometrus minimus*).

In total, survey method explained 41.5% of the total variation observed in the composition of detected taxa, while site explained an additional 28.8% (PERMANOVA  $p < 0.0001$ ). We found no significant difference in homogeneity of dispersions across methods or sites (betadisper  $> 0.05$ ) (Table S7). We also found similar differences in fish communities between survey methods when we limited our comparisons to only taxa observed by both visual and eDNA methods. Survey method explained 33.1% of the total variation observed in the composition of detected taxa, while site explained an additional 33.6% (PERMANOVA,  $p <$

0.001). However, eDNA had significantly lower dispersion than seines across all sites (homogeneity of dispersions  $p = 0.002$ ) (Table S8).

#### *Detection rates of species across methods*

Detection rates of species also differed significantly among survey methods (Figure 4 & S4-S7) with eDNA having a significantly higher sensitivity (98.5%) than both seine (96.7%) and BRUV (96.2%) surveys across all taxa (ANOVA,  $p < 0.0001$ ). Likewise, eDNA had significantly higher probability of occupancy (45.8%) at the site level than both seine (24.9%) and BRUV (28.6%) surveys (ANOVA,  $p < 0.0001$ ) as well as having significantly higher specificity (71.0%) than seines (66.4%) (ANOVA,  $p = 0.01$ ). However, we observed no difference in specificity between BRUV (69.1%) and eDNA or seine surveys at the site level (ANOVA,  $p > 0.5$ ) (Figure 5). Furthermore, we found that eDNA methods had significantly higher probability of occupancy for species known to inhabit surf zone habitats (52.7%) than non-surf zone associated species (40.2%) (ANOVA,  $p = 0.011$ ) (Figure S8).

#### **Fig 4. Heatmap of surf zone fishes jointly detected between surveys**

Teleost species in black font and elasmobranch species in blue font. Environmental DNA approaches more frequently detected 24 of 25 species detected by either BRUV or seine surveys. Only Leopard shark *Triakis semifasciata* was more frequently detected by BRUV surveys.

#### **Fig 5. Probability of Occupancy, Specificity, and Sensitivity of eDNA, Seine, and BRUV surveys**

Environmental DNA surveys had higher probability of occupancy and sensitivity than BRUV and seine surveys. eDNA had significantly higher specificity than seine surveys. We found no difference in specificities between BRUV and eDNA and seine surveys. Probability of occurrence is a measure of how likely a species is present at a site as a function of the commonness of the species as well as the true positive and false positive detection rates of the method surveyed. Sensitivity is the proportion of true positive species detections correctly identified as true positive detections. Specificity is the proportion of true negative species detections identified as negative detections.

The three methods yielded different levels of detection both overall and of individual species of surf zone fish. Our eDNA samples more consistently detected 96.7% (29/30) of all species jointly observed by either BRUV or seines. However, seine surveys more frequently detected barred surfperch (*Amphistichus argenteus*) and walleye surfperch (*Hyperprosopon argenteum*) than eDNA and BRUV surveys. Seine surveys also more frequently detected California corbina (*Menticirrhus undulatus*), northern anchovy (*Engraulis mordax*), giant kelpfish (*Heterostichus rostratus*), and kelp pipefish (*Syngnathus californiensis*) than BRUV surveys, but not for eDNA surveys. Our BRUV surveys detected elasmobranchs and flatfishes (Families Pleuronectidae and Paralichthyidae) more frequently than seine surveys. Leopard shark (*Triakis semifasciata*) was the only species more frequently detected with BRUV (15/18) than eDNA methods (14/18). In total, eDNA only failed to detect five species observed in seine surveys at a single site: round stingray (*Urobatis halleri*), California grunion (*Leuresthes tenuis*), black surfperch (*Embiotoca jacksoni*), dwarf perch (*Micrometrus minimus*), and giant kelpfish (*Heterostichus rostratus*). Likewise, eDNA only failed to detect three species observed with BRUV: leopard shark (*Triakis semifasciata*) and speckled sanddab (*Citharichthys stigmaeus*) at two sites and California bat ray (*Myliobatis californica*) at one site.

Across all sites, eDNA had higher sample coverage estimates (98.9%) than both BRUV (89.6%) and seine (85.2%) surveys (Figure 6). From species rarefaction curves of all species surveyed at the site level, we estimate that both BRUV and seine surveys would have to be conducted at more than 100 sites to achieve similar sample coverage estimates as eDNA at the 18 sites surveyed here. However, within each site surveyed, we found no significant differences in sample coverage estimates between methods (seine mean = 92%, BRUV mean = 91.6%, eDNA mean = 90.3%; ANOVA,  $p > 0.05$ , Table S9).

## Fig 6. Sample Coverage Estimates of eDNA, Seine, and BRUV surveys

Across all sites, environmental DNA surveys had an estimate sample coverage of 98.9%, higher than the sample coverage of BRUV (89.6%) and seine (85.2%) surveys. Shaded area represents 95% confidence intervals. Sample rarefaction curves across sites suggest BRUV and seine surveys would have to be conducted at more than 100 sites to achieve similar sample coverage estimates to eDNA surveys conducted at the 18 sites surveyed here.

### *Comparisons of relative abundance among survey methods*

Estimates of relative abundance varied significantly among the three survey methods and were generally not correlated. We found a significant positive relationship between BRUV *MaxN* values and seine counts ( $R^2 = 0.31$ ,  $p = 0.032$ , Table S10, Figure S9) for only one species, topsmelt (*Atheriniops affinis*). Likewise, there was a significant positive relationship between seine counts and eDNA index scores for only two species, topsmelt,  $R^2 = 0.32$ ,  $p = 0.014$ , Table S11, Figure S10), and California corbina, *Menticirrhus undulatus* ( $R^2 = 0.82$ ,  $p < 0.001$ , Table S11). Similarly, there was a significant positive relationship between BRUV *MaxN* and eDNA index for only three species (kelp bass, *Paralbrax clathratus*, shovelnose guitarfish, *Psuedobatos productus*, and round stingray *Urobatis halleri*) (respective  $R^2$ : 0.45, 0.41, and 0.94,  $p < 0.005$ , Table S12, Figure S11).

## Discussion

Despite extreme methodological differences, seine, BRUV, and eDNA surveys captured largely overlapping, but distinct fish assemblages in surf zone habitats with notable taxonomic biases. Seines more consistently detected surfperches, including the most abundant fished species, barred surfperch (*Amphistichus argenteus*) while BRUV surveys efficiently revealed larger predatory species, particularly elasmobranchs as previously documented [102]. eDNA captured the highest species richness of all three methods, including the majority of species detected by

seine and BRUV surveys (30/36). The mismatch in fish assemblages sampled by each method made comparisons of relative abundance difficult, highlighting a key challenge of comparing survey methods [44].

Importantly, similar to other studies (see Bakker et al. 2017a, Boussarie et al. 2018, Stat et al. 2019, Cole et al. 2021, Fediajevaite et al. 2021, Mirimin et al. 2021), we found that eDNA analysis had higher sensitivity than the two traditional methods, and more frequently detected nearly all jointly observed species at a given site. Our results suggest that seine, BRUV, and eDNA approaches are complementary and their use in tandem provides the most accurate characterization of surf zone fish communities. Recent studies using two of these three methods reached similar conclusions [102,106].

#### *Species assemblages characterized by each method*

Only half of fish species detected by seine and/or BRUV surveys overlapped (18/36) indicating that these methods target different species assemblages. Compared to BRUV surveys, seine surveys captured additional surfperches and croakers associated with surf zone habitats as well as planktivorous coastal pelagic species. In contrast, BRUV surveys detected a greater number of elasmobranch and rocky reef species, particularly carnivores and scavengers, suggesting that fish are attracted from adjacent habitats to the bait, or our current understanding of species' surf zone habitat utilization is limited. Combined, our results align well with previous findings from tropical shorelines indicating that BRUV and seines capture distinct, but overlapping fish assemblages in surf zone habitats [102].

Our finding that eDNA approaches detected 83% (30 out of 36) of fish species observed using seine and BRUV methods, with higher overlap in detected fish assemblages. Importantly,

eDNA approaches also captured an additional 13 surf zone species not observed by our seine or BRUV methods, including the federally listed northern tidewater goby (*Eucyclogobius newberryi*) and commercially-fished species of management concern, such as the flathead grey mullet (*Mugil cephalus*), black croaker (*Cheilotrema saturnum*), white croaker (*Genyonemus lineatus*), and Pacific sanddab (*Citharichthys sordidus*) (Allen & Pondella, 2006). Furthermore, eDNA detected a wide array of elasmobranchs that are typically underrepresented in most traditional sampling approaches [103,109–111] including angel shark (*Squatina californica*), horn shark (*Heterodontus francisci*), California butterfly ray (*Gymnura marmorata*), and broadnose sevengill shark (*Notorynchus cepedianus*). As such, eDNA should be viewed as a valuable complement both seine and BRUV surveys.

The failure of eDNA to detect six common species captured by seine and BRUV surveys was predominantly due to the limitations of the 12S MiFish-U primers, particularly for the surfperches, and associated reference databases [80]. Specifically, *Embiotocidae* is a diverse, recent radiation [112] and the MiFish-U primers perform poorly in such cases, such as rockfish in the genus *Sebastes* [113]. Failure to detect three of six surfperch species is likely a result of insufficient genetic variation within the 12S gene region bounded by the MiFish 12S primer set, leading to many surfperches only being resolved at higher taxonomic ranks (e.g. *Embiotocidae*) [80]. Importantly, we note all three species had corresponding 12S reference barcodes [80] which were nearly identical. In contrast, White seabass (*Atractoscion nobilis*) lacks a MiFish-U barcode and thus could not be resolved given incomplete reference databases [80].

However, two of the six species, soupfin shark (*Galeorhinus galeus*) and kelp pipefish (*Syngnathus californiensis*), were detected with eDNA approaches but below the occupancy thresholds required to be considered a positive detection. We note that these species were

detected in the seine and BRUV surveys, but very rarely (soupfin shark BRUV n=1; kelp pipefish BRUV n=1, seine n=5 individuals). Likewise, eDNA methods only detected 790 total reads of soupfin shark species across all sites. However, we at most observed 56 reads in one technical replicate where it was observed in BRUV footage - below our occupancy threshold of detection at a given site. Likewise, kelp pipefish was detected by eDNA, but again below our occupancy threshold. These low-threshold detections, corroborated here by more traditional methods, may justify adopting different threshold values for eDNA occupancy than employed here, particularly for species that are shown to shed small amounts of DNA or that have high eDNA degradation rates.

eDNA captured a strong signature of surf zone fish assemblages including an additional 13 species of surf zone fishes not observed by seine and BRUV approaches, highlighting the utility of eDNA biomonitoring to improve estimates of total fish diversity in coastal monitoring surveys. eDNA also detected an additional 43 native coastal marine fishes not detected by our seine and BRUV surveys (Tables S5-6). Although many of these species are unlikely to inhabit surf zone habitats directly [114], our study beaches were adjacent to rocky reef kelp forests, rocky intertidal habitats, and estuaries. Our detections of additional native fish species highlight the capacity for movement of both fish and eDNA across pelagic and inshore habitats [62]. Given the potential for transport on the scale of tens to thousands of meters, the detection of fishes from adjacent habitats in eDNA samples is to be expected [70], thus highlighting a potential shortcoming of eDNA approaches, and the need for better understanding of spatial and temporal variability in the dispersal of eDNA within and across ecosystems. Despite the need to better characterize the fate and transport of eDNA, our results still demonstrate that such eDNA approaches can be highly informative of surf zone communities as previously demonstrated [73],

particularly on longer open coast beaches that are not located adjacent to rocky subtidal or intertidal habitats.

### *Detection rates of species across methods*

In addition to the differences in fish assemblages captured by each method, we found substantial differences in the detection frequency of jointly observed species across sites between these methods. Overall, we found that eDNA had higher frequency of detection of nearly all species (29/30) jointly detected by either of the seine and BRUV methods (Tables S5-6). This higher rate of detection also resulted in eDNA having significantly higher sensitivity than both seines and BRUV surveys. Furthermore, results from species rarefaction curves suggest that eDNA surveys capture a larger proportion of the total fish diversity across sites than seine and BRUV surveys, but that each method was deployed with sufficient replication within each site to capture the majority of fish diversity present. Importantly, our results strongly suggest that additional BRUV and seine surveys should be deployed across more sandy beach sites rather than additional deployments at the same site to maximize fish diversity across the region. In contrast, our results suggest that the current eDNA deployment of three sample replicates with three technical replicates was sufficient to adequately capture diversity across the region, providing a baseline sampling regime for future eDNA deployments for monitoring fish diversity in surf zone ecosystems.

One possible explanation for the differences in site-species detection frequency across methods is poor taxonomic resolution or erroneous assignment across methods. The *Anacapa Toolkit* provides confidence scores around each taxonomic rank of assignment, providing information on the accuracy of eDNA identifications [83]. However, such confidence scores are

not readily available for data from seine and BRUV surveys, where taxonomic identification depends on the presence of easily observed morphological characteristics and the resolution of video still captures. For example, topsmelt (*Atherinops affinis*) and California grunion (*Leuresthes tenuis*) are morphologically very similar, with the potential for misidentification, particularly under low visibility conditions for BRUV surveys.

The variation in temporal and spatial scales sampled by each of the three survey methods may also drive differences in site-species detections [27,62,66–68,102,111]. Beach seines survey a small spatial area (here 15.3 m x 1.8 m x 2m) at 0 to 1.5 m depth at a single instantaneous snapshot of sampling [3,31]. In contrast, BRUV units were deployed for an hour at 2-3 m depth and likely attracted species across tens to hundreds of square meters [27,102,105,111]. Although the spatial and temporal scales of eDNA methods in marine systems are still an active area of research, previous studies have found that eDNA integrates across spatial scales from 50 – 1,000 meters and degrades *in situ* between 2 and 12 hours, although laboratory experiments suggest degradation rates on the order of days [53,62,67,68,73,115]. Thus the ecological integration time of each of these surveys is substantially different and likely contributes to the differences we observed in species detections [44,73].

Differences in species detection among methods are also likely driven by the dynamics of eDNA. eDNA shedding rates can vary among [116] and within species [117], driven by differences in physiology and behavior. Increased shedding rates result in higher eDNA detection probabilities, thus biasing which species are successfully detected within surf zone ecosystems. For example, eDNA methods have the potential to be biased during spawning events when high DNA concentrations are released [118]. Likewise, the interaction between high water

transport within and potentially variable degradation rates across species or environmental conditions (temperature, UV, etc.) could influence detection probabilities [66,69,119].

We found that eDNA captured a wide variety of species not typically associated with surf zone habitats, suggesting transport of eDNA from offshore and other intertidal habitats and some level of spatial integration of eDNA measurements. However, our finding that species known to inhabit surf zone habitats had significantly higher probability of occupancy than species known to associate with further offshore habitats, strongly suggests that detection is biased towards species recently inhabiting the surveyed surf zone habitat. This corroborates previous work finding that eDNA signatures were able to distinguish surf zone and adjacent subtidal kelp forest ecosystems from differences in fish assemblage composition as well as relative abundance estimates [73]. However, additional research on modeling eDNA dispersal and its dependence on transport and degradation in a range of habitats could allow modeled adjustment of eDNA data to account for these processes.

### *Relative abundance*

Given the observed low site-species overlap among survey methods, assessing the capability of eDNA approaches to estimate relative abundance was challenging, particularly since eDNA surveys frequently detected a species at multiple sites where seine and BRUV surveys did not detect that species at all. This presents a core challenge of comparing eDNA to capture and visual surveys when the true abundance of species is unknown (Table 1) [44]. However, recent work from studies with greater survey overlap show promise for estimating relative abundance using eDNA approaches [31,40,60].

Given that the ability to estimate relative abundance is a function of the ability to detect a given species, our results suggest that eDNA approaches are more sensitive and better suited than capture and visual survey methods to estimate abundance [87,96,97]. This result, however, is highly dependent on the ability of eDNA approaches to resolve a given taxa. Here eDNA approaches using the MiFish-U primer set failed to resolve the most abundant surf zone species from both seine and BRUV surveys, the surfperches (Family Embiotocidae). Future work is needed using controlled mesocosm studies in which the true abundance of species is known, as well as field studies on tagged and intensively monitored populations to further determine the effectiveness of abundance estimation from eDNA metabarcoding [60]. Importantly, such studies should account for transport, residence time, and variation in species specific shedding and degradation rates of eDNA [119] as well as the role of amplification efficiency for biasing metabarcoding results [120,121].

### *Choosing a survey method*

All survey methods have biases, and the more a particular survey method is used allows the determination of such biases. For example diver avoidance behavior is a well-established bias of visual SCUBA surveys [20,28–30]. Likewise, results of this study showed that each method had distinct advantages and disadvantages. BRUVs are more likely to capture large mobile species than seines, and eDNA captured more total diversity than BRUVs or seines. As such, method selection will largely be a function of the goals of a study, and whether detection of specific taxa or total diversity is a priority.

However, an important consideration when employing eDNA or BRUV data compared to seine surveys (without photographic documentation of hauls) is that the DNA sequences and

ASV tables generated by eDNA and the video footage produced by BRUVs are a permanent records of what was present at a particular time [34] (Table 1). For eDNA in particular, as reference databases are improved, eDNA sequence data can be reanalyzed to test for the presence of previously missed or poorly resolved taxa, e.g. surfperch. In addition, bio-archived eDNA samples or extractions can be revisited for future resequencing and management and biomonitoring applications (e.g., species invasions) [122]. The ability for future analyses of a given ecosystem at a specific time highlights the advantages of applying multiple approaches, where eDNA can provide robust and accurate taxonomic information that can be updated over time while carefully deployed stereo-video approaches (not deployed here given challenging surf conditions) and seine hauls can provide size structure and biomass estimates with demonstrated utility [27,102].

## Conclusion

There is a growing need to survey threatened surf zone and beach ecosystems in the face of global change [11]. Our results suggest that seine, BRUV, and eDNA approaches are complementary techniques for surveying fish diversity in open coast surf zone habitats. eDNA is a relatively quick, effective, and nondestructive approach to surveying marine wildlife, compared to capture and visual surveys of dynamic surf zone habitat (Table 1). Given the cost effectiveness and ability to automate collection and processing, eDNA methods could provide an approach to increase the scope and scale of surf zone ecosystem monitoring across time and space [33,41]. The ease of sample collection in this challenging habitat could allow researchers, marine resource managers, and community scientists to conduct surveys more frequently and in more places, better characterizing surf zone biodiversity and dynamics [25,57,58,123]. Furthermore,

the ability to archive eDNA samples for future use provides an important resource for comparative analyses of ecosystem change [34,122] and for making use of advances in reference libraries.

Although we demonstrated that eDNA provides more robust species detections in surf zone habitats, eDNA cannot provide information on sex ratios or population size structure that can be obtained from seine and BRUV surveys, information critical to resource management [1,3]. Thus, eDNA cannot be viewed as a wholesale replacement for other survey methods, but instead as a complementary tool for biomonitoring surf zone ecosystems [106]. Nevertheless, adding eDNA surveys to traditional monitoring programs or conducting them on their own when and where other methods are untenable has the potential to greatly enhance our knowledge of surf zone fish communities, providing a new source of comprehensive and detailed information needed for management and preservation of these vital coastal ecosystems in the face of global change.

## Acknowledgements

We thank the Channel Islands National Park, The Nature Conservancy, UC Natural Reserve System, CSUCI Santa Rosa Island Field Station, USC Wrigley Institute and NOAA Channel Islands National Marine Sanctuary for access and use of facilities. We thank Laura Beresford, Francesca Puerzer, Justin Hoesterey, and Russel Johnson for their assistance in the field. We thank Beverly Shih, Nikita Sridhar and Lauren Man for their help in library preparation of eDNA samples.

## **Data reporting**

All data, accession numbers, and code used to conduct analyses will be made publicly available on Dryad, NCBI, and GitHub upon acceptance of the manuscript.

## **Financial Disclosure Statement**

Support was provided by the U.S. Department of Interior, Bureau of Ocean Energy Management (BOEM), Environmental Studies Program, Washington D.C. under Co-Op Agreement #M15AC00012, with additional support from the NASA Biodiversity and Ecological Forecasting Program (Grant NNX14AR62A), BOEM Agreement MC15AC00006, and the National Oceanic and Atmospheric Administration in support of the Southern California Bight Marine Biodiversity Observation Network (J.D. & R.J.M.). Additional support was provided by University of California CAlLeDNA summer internship (M.Q.K.), the Undergraduate Research Scholars Program at UCLA through the Holmes O. Miller Endowment Fund (M.Q.K.), and an HHMI Professor award (P.H.B.).

## **References**

1. Olds AD, Vargas-Fonseca E, Connolly RM, Gilby BL, Huijbers CM, Hyndes GA, et al. The ecology of fish in the surf zones of ocean beaches: A global review. *Fish Fish.* 2018;19: 78–89.
2. Luijendijk A, Hagenaars G, Ranasinghe R, Baart F, Donchyts G, Aarninkhof S. The state of the world's beaches. *Sci Rep.* 2018;8: 1–11.
3. Allen LG, Pondella II DJ. Surf zone, coastal pelagic zone, and harbors. *Ecol Mar fishes Calif Adjac waters Univ Calif Press Berkeley.* 2006; 149–166.

4. Klein YL, Osleeb JP, Viola MR. Tourism-generated earnings in the coastal zone: a regional analysis. *J Coast Res.* 2004;20: 1080–1088.
5. McLachlan A, Defeo O, Jaramillo E, Short AD. Sandy beach conservation and recreation: guidelines for optimising management strategies for multi-purpose use. *Ocean Coast Manag.* 2013;71: 256–268.
6. Dugan JE, Hubbard DM, Nielsen KJ, Altstatt J, Bursek J. Baseline Characterization of Sandy Beach Ecosystems Along the South Coast of California - Final Report. 2015. Available: [https://caseagrants.ucsd.edu/sites/default/files/SCMPA-24-Final-Report\\_0.pdf](https://caseagrants.ucsd.edu/sites/default/files/SCMPA-24-Final-Report_0.pdf)
7. Schlacher TA, Dugan J, Schoeman DS, Lastra M, Jones A, Scapini F, et al. Sandy beaches at the brink. *Divers Distrib.* 2007;13: 556–560.
8. NMFS. Fisheries economics of the United States, 2015. NOAA Technical Memorandum; 2017.
9. Dugan JE, Hubbard DM, Martin DL, Engle JM, Richards DM, Davis GE, et al. Macrofauna communities of exposed sandy beaches on the Southern California mainland and Channel Islands. *Proceedings of the Fifth California Islands Symposium Minerals Management Service Publication.* 2000. pp. 339–346.
10. Schlacher TA, Schoeman DS, Dugan J, Lastra M, Jones A, Scapini F, et al. Sandy beach ecosystems: key features, sampling issues, management challenges and climate change impacts. *Mar Ecol.* 2008;29: 70–90.
11. Defeo O, McLachlan A, Schoeman DS, Schlacher TA, Dugan J, Jones A, et al. Threats to sandy beach ecosystems: a review. *Estuar Coast Shelf Sci.* 2009;81: 1–12.
12. Jaramillo E, Dugan J, Hubbard D, Manzano M, Duarte C. Ranking the ecological effects of coastal armoring on mobile macroinvertebrates across intertidal zones on sandy

beaches. *Sci Total Environ.* 2021;755: 142573.

13. Barnard PL, Dugan JE, Page HM, Wood NJ, Hart JAF, Cayan DR, et al. Multiple climate change-driven tipping points for coastal systems. *Sci Rep.* 2021;11: 1–13.

14. Schooler NK, Dugan JE, Hubbard DM. No lines in the sand: Impacts of intense mechanized maintenance regimes on sandy beach ecosystems span the intertidal zone on urban coasts. *Ecol Indic.* 2019;106: 105457.

15. Dugan JE, Emery KA, Alber M, Alexander CR, Byers JE, Gehman AM, et al. Generalizing ecological effects of shoreline armoring across soft sediment environments. *Estuaries and coasts.* 2018;41: 180–196.

16. Manning LM, Peterson CH, Fegley SR. Degradation of surf-fish foraging habitat driven by persistent sedimentological modifications caused by beach nourishment. *Bull Mar Sci.* 2013;89: 83–106.

17. Parkinson RW, Ogurcak DE. Beach nourishment is not a sustainable strategy to mitigate climate change. *Estuar Coast Shelf Sci.* 2018;212: 203–209.

18. Peterson CH, Bishop MJ, D’Anna LM, Johnson GA. Multi-year persistence of beach habitat degradation from nourishment using coarse shelly sediments. *Sci Total Environ.* 2014;487: 481–492.

19. Allen LG, Horn MH. *The ecology of marine fishes: California and adjacent waters.* Univ of California Press; 2006.

20. Carlisle JG, Schott JW, Abrahamson NJ. The barred surf perch in Southern California, Calif. *Dept Fish Fish Bull.* 1960;109.

21. Kuriyama PT, Branch TA, Hicks AC, Harms JH, Hamel OS. Investigating three sources of bias in hook-and-line surveys: survey design, gear saturation, and multispecies

interactions. *Can J Fish Aquat Sci.* 2019;76: 192–207.

22. Andradi-Brown DA, Macaya-Solis C, Exton DA, Gress E, Wright G, Rogers AD. Assessing Caribbean shallow and mesophotic reef fish communities using baited-remote underwater video (BRUV) and diver-operated video (DOV) survey techniques. *PLoS One.* 2016;11: e0168235.
23. Ceni G, Vieira JP. Looking through a dirty glass: how different can the characterization of a fish fauna be when distinct nets are used for sampling? *Zool.* 2013;30: 499–505.
24. Baker R, Sheaves M. Visual surveys reveal high densities of large piscivores in shallow estuarine nurseries. *Mar Ecol Prog Ser.* 2006;323: 75–82.
25. Kelly RP, Port J a., Yamahara KM, Martone RG, Lowell N, Thomsen PF, et al. Harnessing DNA to improve environmental management. *Science* (80- ). 2014;344. doi:10.1126/science.1251156
26. Borland HP, Schlacher TA, Gilby BL, Connolly RM, Yabsley NA, Olds AD. Habitat type and beach exposure shape fish assemblages in the surf zones of ocean beaches. *Mar Ecol Prog Ser.* 2017;570: 203–211.
27. Schramm KD, Harvey ES, Goetze JS, Travers MJ, Warnock B, Saunders BJ. A comparison of stereo-BRUV, diver operated and remote stereo-video transects for assessing reef fish assemblages. *J Exp Mar Bio Ecol.* 2020;524: 151273.
28. Hodgson G, Maun L, Shuman C. Reef Check Survey Manual. Reef Check, Inst Environ Univ California, Los Angeles, CA. 2004.
29. Kushner DJ, Rassweiler A, McLaughlin JP, Lafferty KD. A multi-decade time series of kelp forest community structure at the California Channel Islands. *Ecology.* 2013;94: 2655. doi:<https://doi.org/10.1890/13-0562R.1>

30. Lindfield SJ, Harvey ES, McIlwain JL, Halford AR. Silent fish surveys: bubble-free diving highlights inaccuracies associated with SCUBA-based surveys in heavily fished areas. Börger L, editor. *Methods Ecol Evol.* 2014;5: 1061–1069. doi:10.1111/2041-210X.12262
31. Shelton AO, Kelly RP, O'Donnell JL, Park L, Schwenke P, Greene C, et al. Environmental DNA provides quantitative estimates of a threatened salmon species. *Biol Conserv.* 2019;237: 383–391. doi:10.1016/j.biocon.2019.07.003
32. Lowry M, Folpp H, Gregson M, McKenzie R. A comparison of methods for estimating fish assemblages associated with estuarine artificial reefs. *Brazilian J Oceanogr.* 2011;59: 119–131.
33. Beng KC, Corlett RT. Applications of environmental DNA (eDNA) in ecology and conservation: opportunities, challenges and prospects. *Biodivers Conserv.* 2020;29: 2089–2121.
34. Deiner K, Bik HM, Mächler E, Seymour M, Lacoursière-Roussel A, Altermatt F, et al. Environmental DNA metabarcoding: Transforming how we survey animal and plant communities. *Mol Ecol.* 2017;26: 5872–5895. doi:10.1111/mec.14350
35. Taberlet P, Bonin A, Zinger L, Coissac E. *Environmental DNA: For biodiversity research and monitoring.* Oxford University Press; 2018.
36. Taberlet P, Coissac E, Hajibabaei M, Rieseberg LH. Environmental DNA. *Mol Ecol.* 2012;21: 1789–1793. doi:10.1111/j.1365-294X.2012.05542.x
37. Djurhuus A, Closek CJ, Kelly RP, Pitz KJ, Michisaki RP, Starks HA, et al. Environmental DNA reveals seasonal shifts and potential interactions in a marine community. *Nat Commun.* 2020;11: 1–9.

38. Closek CJ, Santora JA, Starks HA, Schroeder ID, Andruszkiewicz EA, Sakuma KM, et al. Marine vertebrate biodiversity and distribution within the central California Current using environmental DNA (eDNA) metabarcoding and ecosystem surveys. *Front Mar Sci.* 2019;6: 732.
39. Doi H, Inui R, Akamatsu Y, Kanno K, Yamanaka H, Takahara T, et al. Environmental DNA analysis for estimating the abundance and biomass of stream fish. *Freshw Biol.* 2017;62: 30–39.
40. Stoeckle MY, Adolf J, Charlop-Powers Z, Dunton KJ, Hinks G, VanMorter SM. Trawl and eDNA assessment of marine fish diversity, seasonality, and relative abundance in coastal New Jersey, USA. *ICES J Mar Sci.* 2021;78: 293–304.
41. Bohmann K, Evans A, Gilbert MTP, Carvalho GR, Creer S, Knapp M, et al. Environmental DNA for wildlife biology and biodiversity monitoring. *Trends Ecol Evol.* 2014;29: 358–367. doi:10.1016/j.tree.2014.04.003
42. Thomsen PF, Kielgast J, Iversen LL, Møller PR, Rasmussen M, Willerslev E. Detection of a diverse marine fish fauna using environmental DNA from seawater samples. *PLoS One.* 2012;7: e41732.
43. Valentini A, Taberlet P, Miaud C, Civade R, Herder J, Thomsen PF, et al. Next-generation monitoring of aquatic biodiversity using environmental DNA metabarcoding. *Mol Ecol.* 2015; n/a-n/a. doi:10.1111/mec.13428
44. Kelly RP, Closek CJ, O'Donnell JL, Kralj JE, Shelton AO, Samhouri JF. Genetic and manual survey methods yield different and complementary views of an ecosystem. *Front Mar Sci.* 2017;3: 283. doi:<https://doi.org/10.3389/fmars.2016.00283>
45. Gold ZJ. Design and Implementation of Environmental DNA Metabarcoding Methods for

Monitoring the Southern California Marine Protected Area Network. UCLA. 2020.

doi:ark:/13030/m5j44187

46. Thomas AC, Tank S, Nguyen PL, Ponce J, Sinnesael M, Goldberg CS. A system for rapid eDNA detection of aquatic invasive species. *Environ DNA*. 2019.

47. LeBlanc F, Belliveau V, Watson E, Coomber C, Simard N, DiBacco C, et al. Environmental DNA (eDNA) detection of marine aquatic invasive species (AIS) in Eastern Canada using a targeted species-specific qPCR approach. *Manag Biol Invasions*. 2020;11: 201.

48. Weltz K, Lyle JM, Ovenden J, Morgan JAT, Moreno DA, Semmens JM. Application of environmental DNA to detect an endangered marine skate species in the wild. *PLoS One*. 2017;12: e0178124.

49. Simpfendorfer C, Kyne P, Noble T, Goldsbury J, Basiita R, Lindsay R, et al. Environmental DNA detects Critically Endangered largetooth sawfish in the wild. *Endanger Species Res*. 2016;30: 109–116. doi:10.3354/esr00731

50. Lafferty KD, Benesh KC, Mahon AR, Jerde CL, Lowe CG. Detecting southern California’s white sharks with environmental DNA. *Front Mar Sci*. 2018;5: 1–6.

51. West KM, Stat M, Harvey ES, Skepper CL, DiBattista JD, Richards ZT, et al. eDNA metabarcoding survey reveals fine-scale coral reef community variation across a remote, tropical island ecosystem. *Mol Ecol*. 2020;29: 1069–1086.

52. Stat M, Huggett MJ, Bernasconi R, DiBattista JD, Berry TE, Newman SJ, et al. Ecosystem biomonitoring with eDNA: metabarcoding across the tree of life in a tropical marine environment. *Sci Rep*. 2017;7: 12240. doi:10.1038/s41598-017-12501-5

53. Port JA, O’Donnell JL, Romero-Maraccini OC, Leary PR, Litvin SY, Nickols KJ, et al.

Assessing vertebrate biodiversity in a kelp forest ecosystem using environmental DNA.  
Mol Ecol. 2015. doi:<https://doi.org/10.1111/mec.13481>

54. Stoeckle MY, Soboleva L, Charlop-Powers Z. Aquatic environmental DNA detects  
seasonal fish abundance and habitat preference in an urban estuary. PLoS One. 2017;12.  
55. Andruszkiewicz EA, Starks HA, Chavez FP, Sassoubre LM, Block BA, Boehm AB.  
Biomonitoring of marine vertebrates in Monterey Bay using eDNA metabarcoding. PLoS  
One. 2017;12: e0176343.

56. Thomsen PF, Møller PR, Sigsgaard EE, Knudsen SW, Jørgensen OA, Willerslev E.  
Environmental DNA from seawater samples correlate with trawl catches of subarctic,  
deepwater fishes. PLoS One. 2016;11. doi:10.1371/journal.pone.0165252

57. Meyer R, Ramos MM, Lin M, Schweizer TM, Gold Z, Ramos DR, et al. The CALeDNA  
program: Citizen scientists and researchers inventory California's biodiversity. Calif  
Agric. 2021;75: 20–32. Available: <http://dx.doi.org/10.3733/ca.2021a0001>

58. Freiwald J, Meyer R, Caselle JE, Blanchette CA, Hovel K, Neilson D, et al. Citizen  
science monitoring of marine protected areas: Case studies and recommendations for  
integration into monitoring programs. Mar Ecol. 2018;39: e12470.  
doi:10.1111/maec.12470

59. Biggs J, Ewald N, Valentini A, Gaboriaud C, Dejean T, Griffiths RA, et al. Using eDNA  
to develop a national citizen science-based monitoring programme for the great crested  
newt (*Triturus cristatus*). Biol Conserv. 2014;183: 19–28.  
doi:10.1016/j.biocon.2014.11.029

60. Di Muri C, Handley LL, Bean CW, Li J, Peirson G, Sellers GS, et al. Read counts from  
environmental DNA (eDNA) metabarcoding reflect fish abundance and biomass in

drained ponds. Metabarcoding and Metagenomics. 2020;4: e56959.

61. Ushio M, Murakami H, Masuda R, Sado T, Miya M, Sakurai S, et al. Quantitative monitoring of multispecies fish environmental DNA using high-throughput sequencing. Metabarcoding and Metagenomics. 2018;2: e23297.

62. O'Donnell JL, Kelly RP, Shelton AO, Samhouri JF, Lowell NC, Williams GD. Spatial distribution of environmental DNA in a nearshore marine habitat. PeerJ. 2017;5: e3044. doi:10.7717/peerj.3044

63. West K, Travers MJ, Stat M, Harvey ES, Richards ZT, DiBattista JD, et al. Large-scale eDNA metabarcoding survey reveals marine biogeographic break and transitions over tropical north-western Australia. Divers Distrib. 2021.

64. Gold Z, Sprague J, Kushner DJ, Zerecero E, Barber PH. eDNA metabarcoding as a biomonitoring tool for marine protected areas. bioRxiv. 2020; 2020.08.20.258889. doi:10.1101/2020.08.20.258889

65. Lamy T, Pitz KJ, Chavez FP, Yorke CE, Miller RJ. Environmental DNA reveals the fine-grained and hierarchical spatial structure of kelp forest fish communities. Sci Rep. 2021;11: 1–13.

66. Collins RA, Wangenstein OS, O'Gorman EJ, Mariani S, Sims DW, Genner MJ. Persistence of environmental DNA in marine systems. Commun Biol. 2018;1: 1–11.

67. Murakami H, Yoon S, Kasai A, Minamoto T, Yamamoto S, Sakata MK, et al. Dispersion and degradation of environmental DNA from caged fish in a marine environment. Fish Sci. 2019;85: 327–337. doi:https://doi.org/10.1007/s12562-019-01341-z

68. Ely T, Barber PH, Man L, Gold Z. Short-lived detection of an introduced vertebrate eDNA signal in a nearshore rocky reef environment. PLoS One. 2021;16: e0245314.

69. Shogren AJ, Tank JL, Andruszkiewicz E, Olds B, Mahon AR, Jerde CL, et al. Controls on eDNA movement in streams: Transport, Retention, and Resuspension /704/158/2464 /704/242 /45/77 article. Sci Rep. 2017;7. doi:10.1038/s41598-017-05223-1
70. Andruszkiewicz EA, Koseff JR, Fringer OB, Ouellette NT, Lowe AB, Edwards CA, et al. Modeling environmental DNA transport in the coastal ocean using Lagrangian particle tracking. Front Mar Sci. 2019;6: 477. doi:10.3389/fmars.2019.00477
71. Kelly RP, Gallego R, Jacobs-Palmer E. The effect of tides on nearshore environmental DNA. PeerJ. 2018;6: e4521. doi:https://doi.org/10.7717/peerj.4521
72. Yamamoto S, Minami K, Fukaya K, Takahashi K, Sawada H, Murakami H, et al. Environmental DNA as a “snapshot” of fish distribution: A case study of Japanese jack mackerel in Maizuru Bay, Sea of Japan. PLoS One. 2016;11. doi:10.1371/journal.pone.0149786
73. Monuki K, Barber PH, Gold Z. eDNA captures depth partitioning in a kelp forest ecosystem. PLoS One. 2021;16: e0253104.
74. French B, Wilson S, Holmes T, Kendrick A, Rule M, Ryan N. Comparing five methods for quantifying abundance and diversity of fish assemblages in seagrass habitat. Ecol Indic. 2021;124: 107415.
75. Gutiérrez-Martínez M, Muñoz-Lechuga R, Rodríguez-García C, Sanz-Fernández V, Cabrera-Castro R. Spatial-temporal patterns of fish and macroinvertebrate communities in sandy beach surf zones: Short and medium-term variations. J Sea Res. 2021;168: 101993.
76. Stoeckle MY, Das Mishu M, Charlop-Powers Z. Improved environmental DNA reference library detects overlooked marine fishes in New Jersey, United States. Front Mar Sci. 2020;7: 226.

77. Leary SL, Underwood W, Anthony R, Cartner S, Corey D, Grandin T, et al. AVMA guidelines for the euthanasia of animals: 2013 edition. American Veterinary Medical Association Schaumburg, IL; 2013.
78. Vargas-Fonseca E, Olds AD, Gilby BL, Connolly RM, Schoeman DS, Huijbers CM, et al. Combined effects of urbanization and connectivity on iconic coastal fishes. *Divers Distrib.* 2016;22: 1328–1341.
79. Ellis DM. Evaluation of video camera technique for indexing abundances of juvenile pink snapper *Pristipomoides filamentosus*, and other Hawaiian insular shelf fishes. *Fish Bull.* 1995;93: 67–77.
80. Gold Z, Curd E, Goodwin K, Choi E, Frable B, Thompson A, et al. Improving Metabarcoding Taxonomic Assignment: A Case Study of Fishes in a Large Marine Ecosystem. 2021.
81. Spens J, Evans AR, Halfmaerten D, Knudsen SW, Sengupta ME, Mak SST, et al. Comparison of capture and storage methods for aqueous microbial eDNA using an optimized extraction protocol: advantage of enclosed filter. Yu D, editor. *Methods Ecol Evol.* 2017;8: 635–645. doi:10.1111/2041-210X.12683
82. Miya M, Sato Y, Fukunaga T, Sado T, Poulsen JY, Sato K, et al. MiFish, a set of universal PCR primers for metabarcoding environmental DNA from fishes: detection of more than 230 subtropical marine species. *R Soc Open Sci.* 2015;2: 150088. doi:10.1098/rsos.150088
83. Curd EE, Gold Z, Kandlikar GS, Gomer J, Ogden M, O’Connell T, et al. Anacapa: an environmental DNA toolkit for processing multilocus metabarcode datasets. *Methods Ecol Evol.* 2019;10: 1469– 1475. doi:<https://doi.org/10.1111/2041-210X.13214>

- 907 84. R Core Team. R: A Language and Environment for Statistical Computing. Vienna;  
908 Austria; 2020.
- 909 85. Costello M, Fleharty M, Abreu J, Farjoun Y, Ferriera S, Holmes L, et al. Characterization  
910 and remediation of sample index swaps by non-redundant dual indexing on massively  
911 parallel sequencing platforms. BMC Genomics. 2018;19: 332.
- 912 86. Goldberg CS, Turner CR, Deiner K, Klymus KE, Thomsen PF, Murphy MA, et al.  
913 Critical considerations for the application of environmental DNA methods to detect  
914 aquatic species. 2016 [cited 20 Mar 2019]. doi:10.1111/2041-210X.12595
- 915 87. Chambert T, Pilliod DS, Goldberg CS, Doi H, Takahara T. An analytical framework for  
916 estimating aquatic species density from environmental DNA. Ecol Evol. 2018;8: 3468–  
917 3477. doi:10.1002/ece3.3764
- 918 88. McMurdie PJ, Holmes S. phyloseq: an R package for reproducible interactive analysis and  
919 graphics of microbiome census data. PLoS One. 2013;8: e61217.
- 920 89. Oksanen J, Blanchet FG, Friendly M, Kindt R, Legendre P, McGlinn D, et al. vegan:  
921 Community Ecology Package. 2020.
- 922 90. Froese R, Pauly D. FishBase. Fisheries Centre, University of British Columbia; 2010.
- 923 91. Kells VA, Rocha LA, Allen LG. A field guide to coastal fishes: from Alaska to California.  
924 JHU Press; 2016.
- 925 92. Chen H, Boutros PC. VennDiagram: a package for the generation of highly-customizable  
926 Venn and Euler diagrams in R. BMC Bioinformatics. 2011;12: 1–7.
- 927 93. Wickham H, François R, Henry L, Müller K. dplyr: A Grammar of Data Manipulation.  
928 2021.
- 929 94. Wickham H. ggplot2: Elegant Graphics for Data Analysis. Springer-Verlag New York;

2016.

95. Hsieh TC, Ma KH, Chao A. iNEXT: an R package for rarefaction and extrapolation of species diversity (Hill numbers). *Methods Ecol Evol.* 2016;7: 1451–1456.  
doi:<https://doi.org/10.1111/2041-210X.12613>
96. Royle JA, Link WA. Generalized site occupancy models allowing for false positive and false negative errors. *Ecology.* 2006;87: 835–841.
97. Schmidt BR, Kery M, Ursenbacher S, Hyman OJ, Collins JP. Site occupancy models in the analysis of environmental DNA presence/absence surveys: a case study of an emerging amphibian pathogen. *Methods Ecol Evol.* 2013;4: 646–653.
98. Gold Z, Wall AR, Curd EE, Kelly RP, Pentcheff ND, Ripma L, et al. eDNA metabarcoding bioassessment of endangered fairy shrimp (*Branchinecta* spp.). *Conserv Genet Resour.* 2020;12: 685–690.
99. Team RC. R: A language and environment for statistical computing. Vienna, Austria: R Foundation for Statistical Computing; 2014. 2014.
100. Goodrich B, Gabry J, Ali I, Brilleman S. rstanarm: Bayesian applied regression modeling via Stan. *R Packag version.* 2018;2: 1758.
101. Parikh R, Mathai A, Parikh S, Sekhar GC, Thomas R. Understanding and using sensitivity, specificity and predictive values. *Indian J Ophthalmol.* 2008;56: 45.
102. Esmaeili YS, Corte GN, Checon HH, Gomes TRC, Lefcheck JS, Amaral ACZ, et al. Comprehensive assessment of shallow surf zone fish biodiversity requires a combination of sampling methods. *Mar Ecol Prog Ser.* 2021;667: 131–144.
103. Boussarie G, Bakker J, Wangensteen OS, Mariani S, Bonnin L, Juhel J-B, et al. Environmental DNA illuminates the dark diversity of sharks. *Sci Adv.* 2018;4: eaap9661.

104. Bakker J, Wangensteen OS, Chapman DD, Boussarie G, Buddo D, Guttridge TL, et al. Environmental DNA reveals tropical shark diversity in contrasting levels of anthropogenic impact. *Sci Rep.* 2017;7: 1–11.
105. Cole VJ, Harasti D, Lines R, Stat M. Estuarine fishes associated with intertidal oyster reefs characterized using environmental DNA and baited remote underwater video. *Environ DNA.* 2021.
106. Stat M, John J, DiBattista JD, Newman SJ, Bunce M, Harvey ES. Combined use of eDNA metabarcoding and video surveillance for the assessment of fish biodiversity. *Conserv Biol.* 2019;33: 196–205.
107. Fediajevaite J, Priestley V, Arnold R, Savolainen V. Meta-analysis shows that environmental DNA outperforms traditional surveys, but warrants better reporting standards. *Ecol Evol.* 2021.
108. Mirimin L, Desmet S, Romero DL, Fernandez SF, Miller DL, Mynott S, et al. Don't catch me if you can—Using cabled observatories as multidisciplinary platforms for marine fish community monitoring: An in situ case study combining Underwater Video and environmental DNA data. *Sci Total Environ.* 2021;773: 145351.
109. Bakker J, Wangensteen OS, Chapman DD, Boussarie G, Buddo D, Guttridge TL, et al. Environmental DNA reveals tropical shark diversity in contrasting levels of anthropogenic impact. *Sci Rep.* 2017;7: 16886. doi:10.1038/s41598-017-17150-2
110. Bassett DK, Montgomery JC. Investigating nocturnal fish populations in situ using baited underwater video: with special reference to their olfactory capabilities. *J Exp Mar Bio Ecol.* 2011;409: 194–199.
111. Jeunen G-J, Urban L, Lewis R, Knapp M, Lamare M, Rayment W, et al. Marine

- environmental DNA (eDNA) for biodiversity assessments: a one-to-one comparison between eDNA and baited remote underwater video (BRUV) surveys. *Authorea Prepr.* 2020.
112. Longo G, Bernardi G. The evolutionary history of the embiotocid surfperch radiation based on genome-wide RAD sequence data. *Mol Phylogenet Evol.* 2015;88: 55–63.
113. Min MA, Barber PH, Gold Z. MiSebastes: An eDNA metabarcoding primer set for rockfishes (genus *Sebastes*). *Conserv Genet Resour.* 2021; 1–10.
114. Love MS, Passarelli JK. *Miller and Lea’s Guide to the Coastal Marine Fishes of California*. 2nd. University of California Agriculture and Natural Resources; 2020.
115. Yamamoto S, Masuda R, Sato Y, Sado T, Araki H, Kondoh M, et al. Environmental DNA metabarcoding reveals local fish communities in a species-rich coastal sea. *Sci Rep.* 2017;7: 40368.
116. Andruszkiewicz Allan E, Zhang WG, C Lavery A, F Govindarajan A. Environmental DNA shedding and decay rates from diverse animal forms and thermal regimes. *Environ DNA.* 2021;3: 492–514.
117. Thalinger B, Rieder A, Teuffenbach A, Pütz Y, Schwerte T, Wanzenboeck J, et al. The effect of activity, energy use, and species identity on environmental DNA shedding of freshwater fish. *Front Ecol Evol.* 2021;9: 73.
118. Tillotson MD, Kelly RP, Duda JJ, Hoy M, Kralj J, Quinn TP. Concentrations of environmental DNA (eDNA) reflect spawning salmon abundance at fine spatial and temporal scales. *Biol Conserv.* 2018;220: 1–11. doi:10.1016/J.BIOCON.2018.01.030
119. Barnes MA, Turner CR. The ecology of environmental DNA and implications for conservation genetics. *Conserv Genet.* 2016;17: 1–17. doi:10.1007/s10592-015-0775-4

999 120. McLaren MR, Willis AD, Callahan BJ. Consistent and correctable bias in metagenomic  
1000 sequencing experiments. *Elife*. 2019;8: e46923.

1001 121. Kelly RP, Shelton AO, Gallego R. Understanding PCR processes to Draw Meaningful  
1002 conclusions from environmental DNA Studies. *Sci Rep*. 2019;9: 1–14.  
1003 doi:<https://doi.org/10.1038/s41598-019-48546-x>

1004 122. Jarman SN, Berry O, Bunce M. The value of environmental DNA biobanking for long-  
1005 term biomonitoring. *Nat Ecol Evol*. 2018;2: 1192–1193.

1006 123. Goodwin K, Davis J, Strom M, Werner C. NOAA’Omics Strategy: Strategic Application  
1007 of Transformational Tools. 2020.  
1008

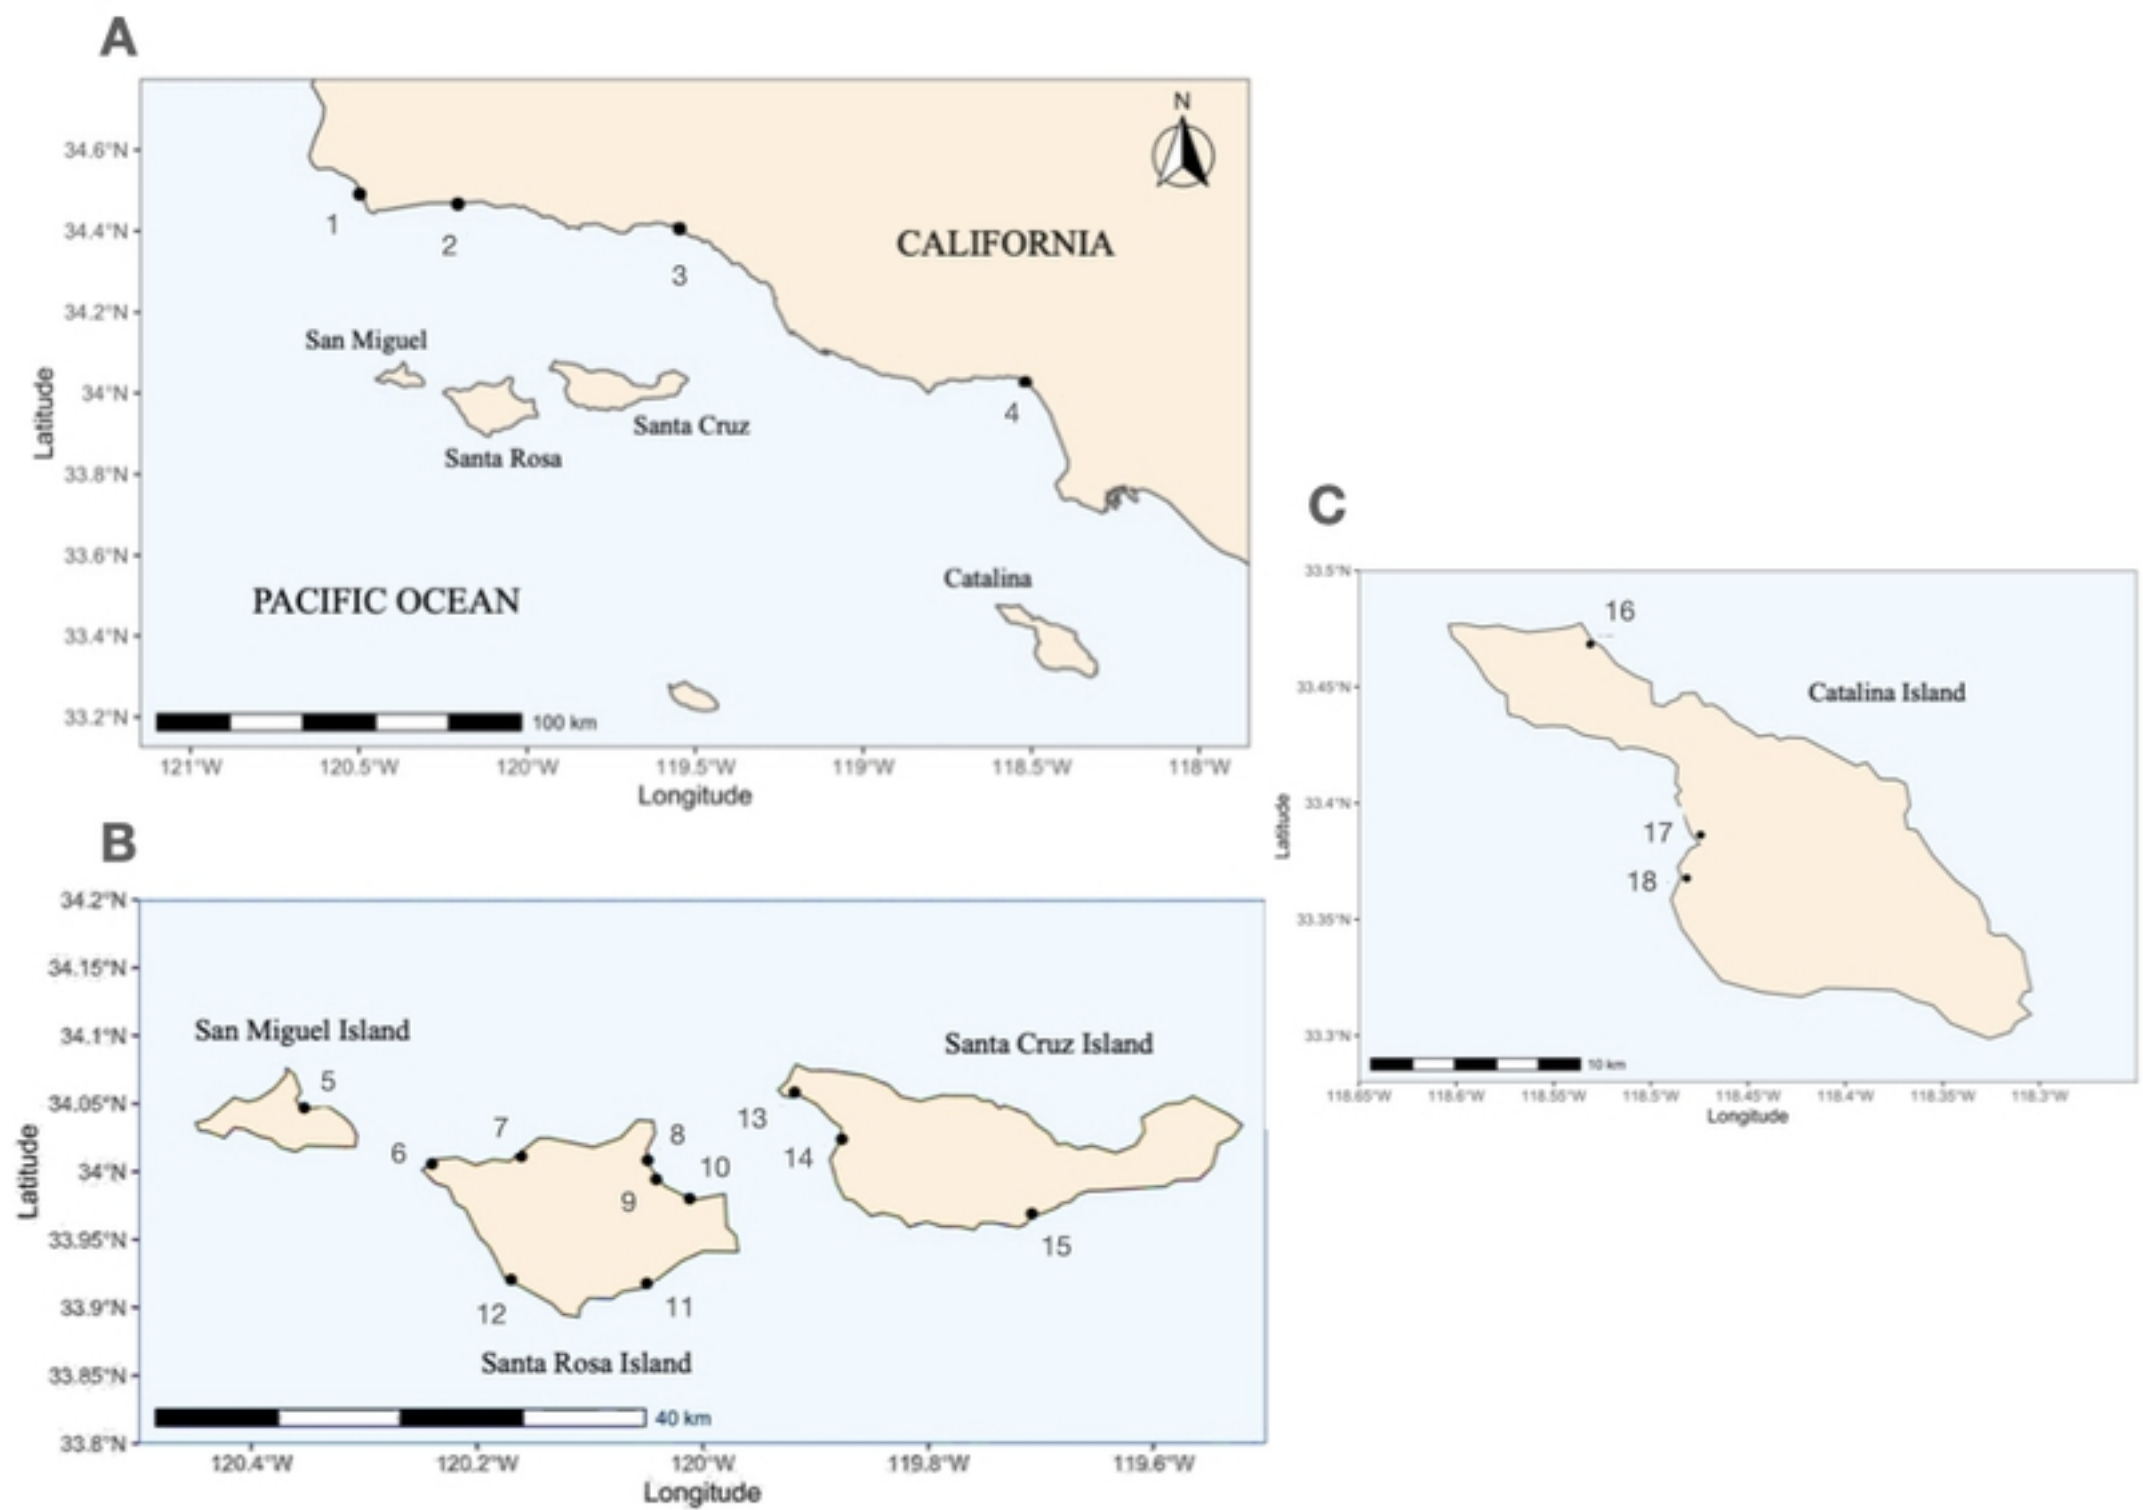

Figure 1

BRUV

Seine

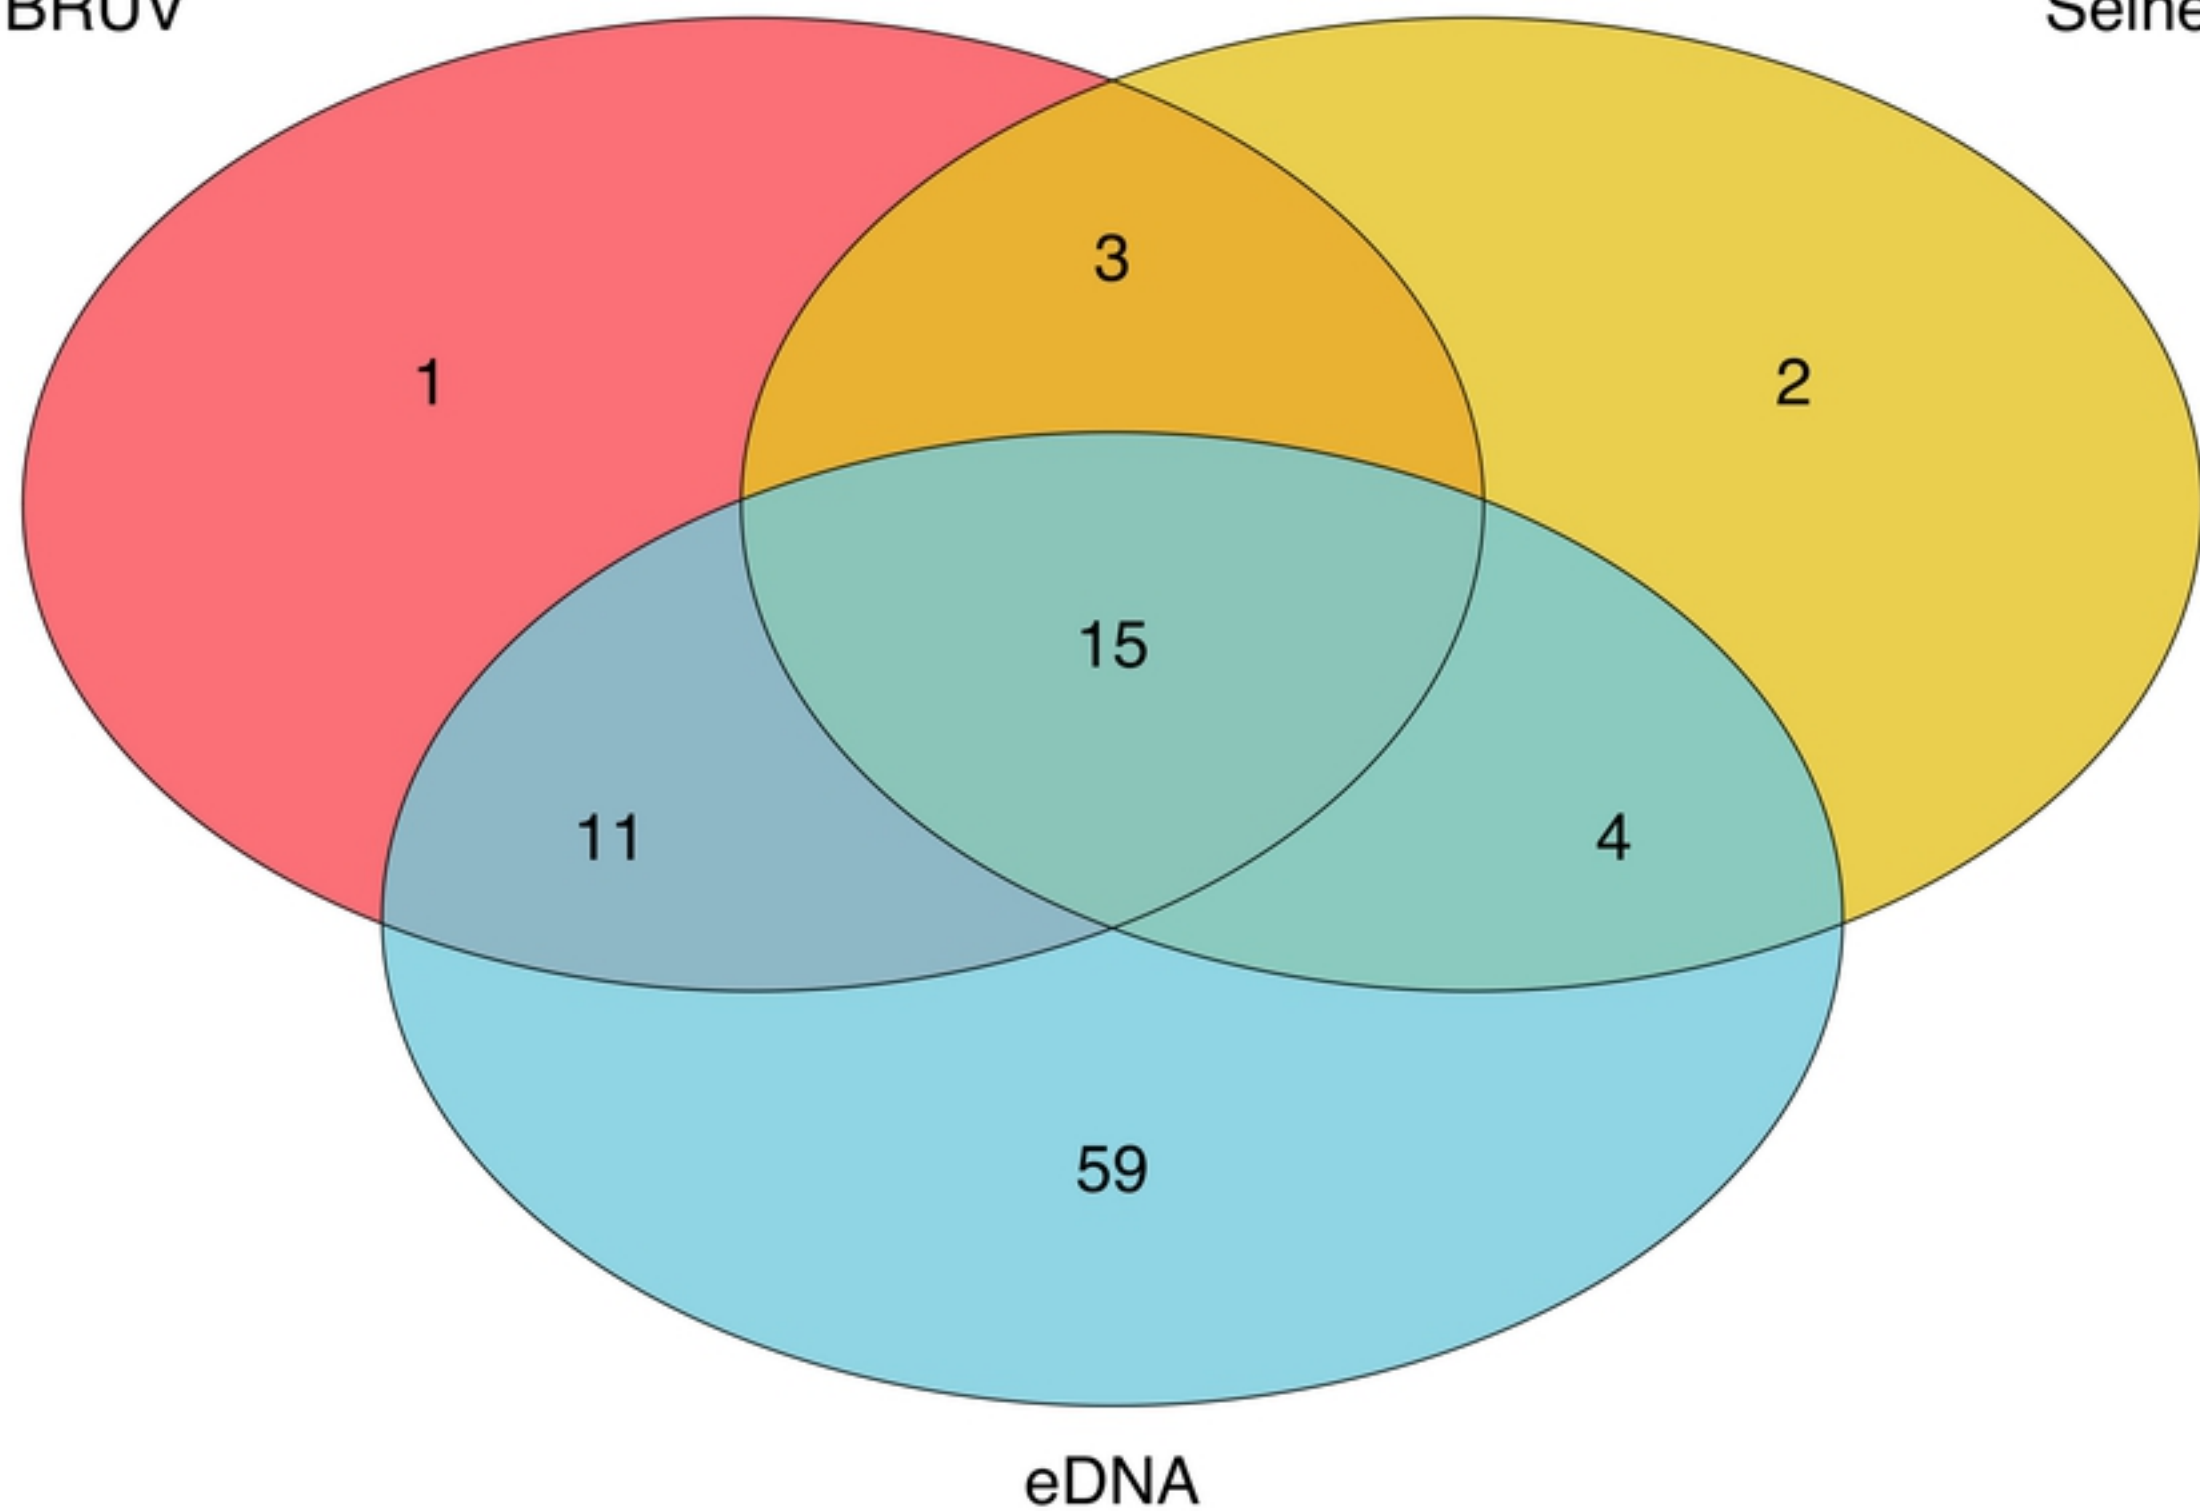

Figure 2

# Constrained Analysis of Principal Components

All Detected Species

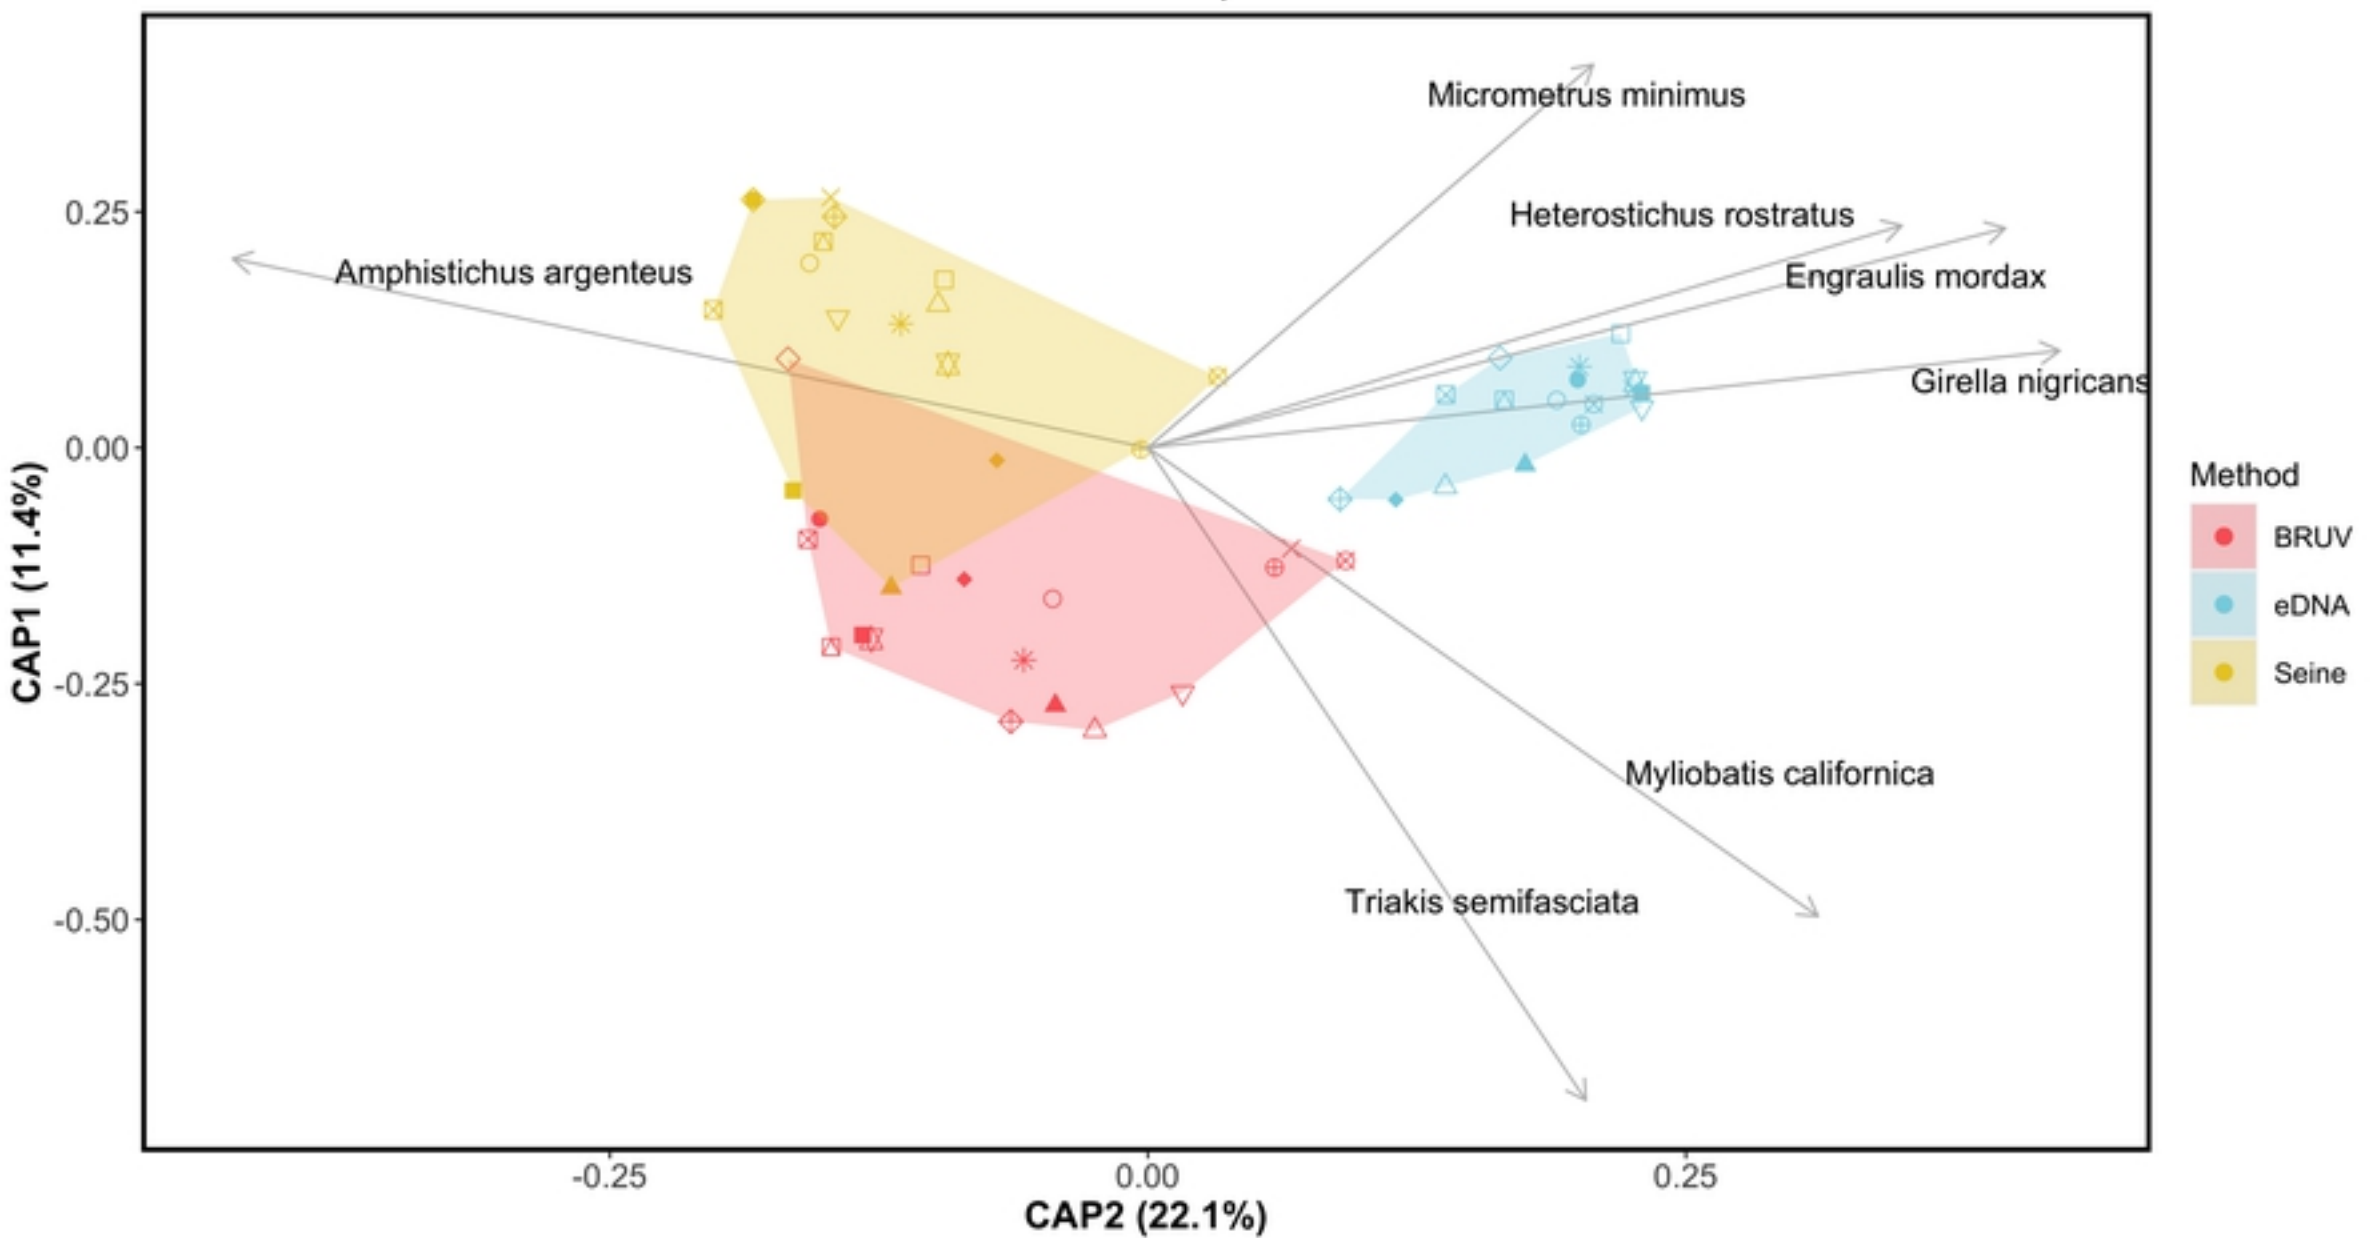

Figure 3

Site-Species Co-Detections  
All 30 Visual and eDNA Detected Species

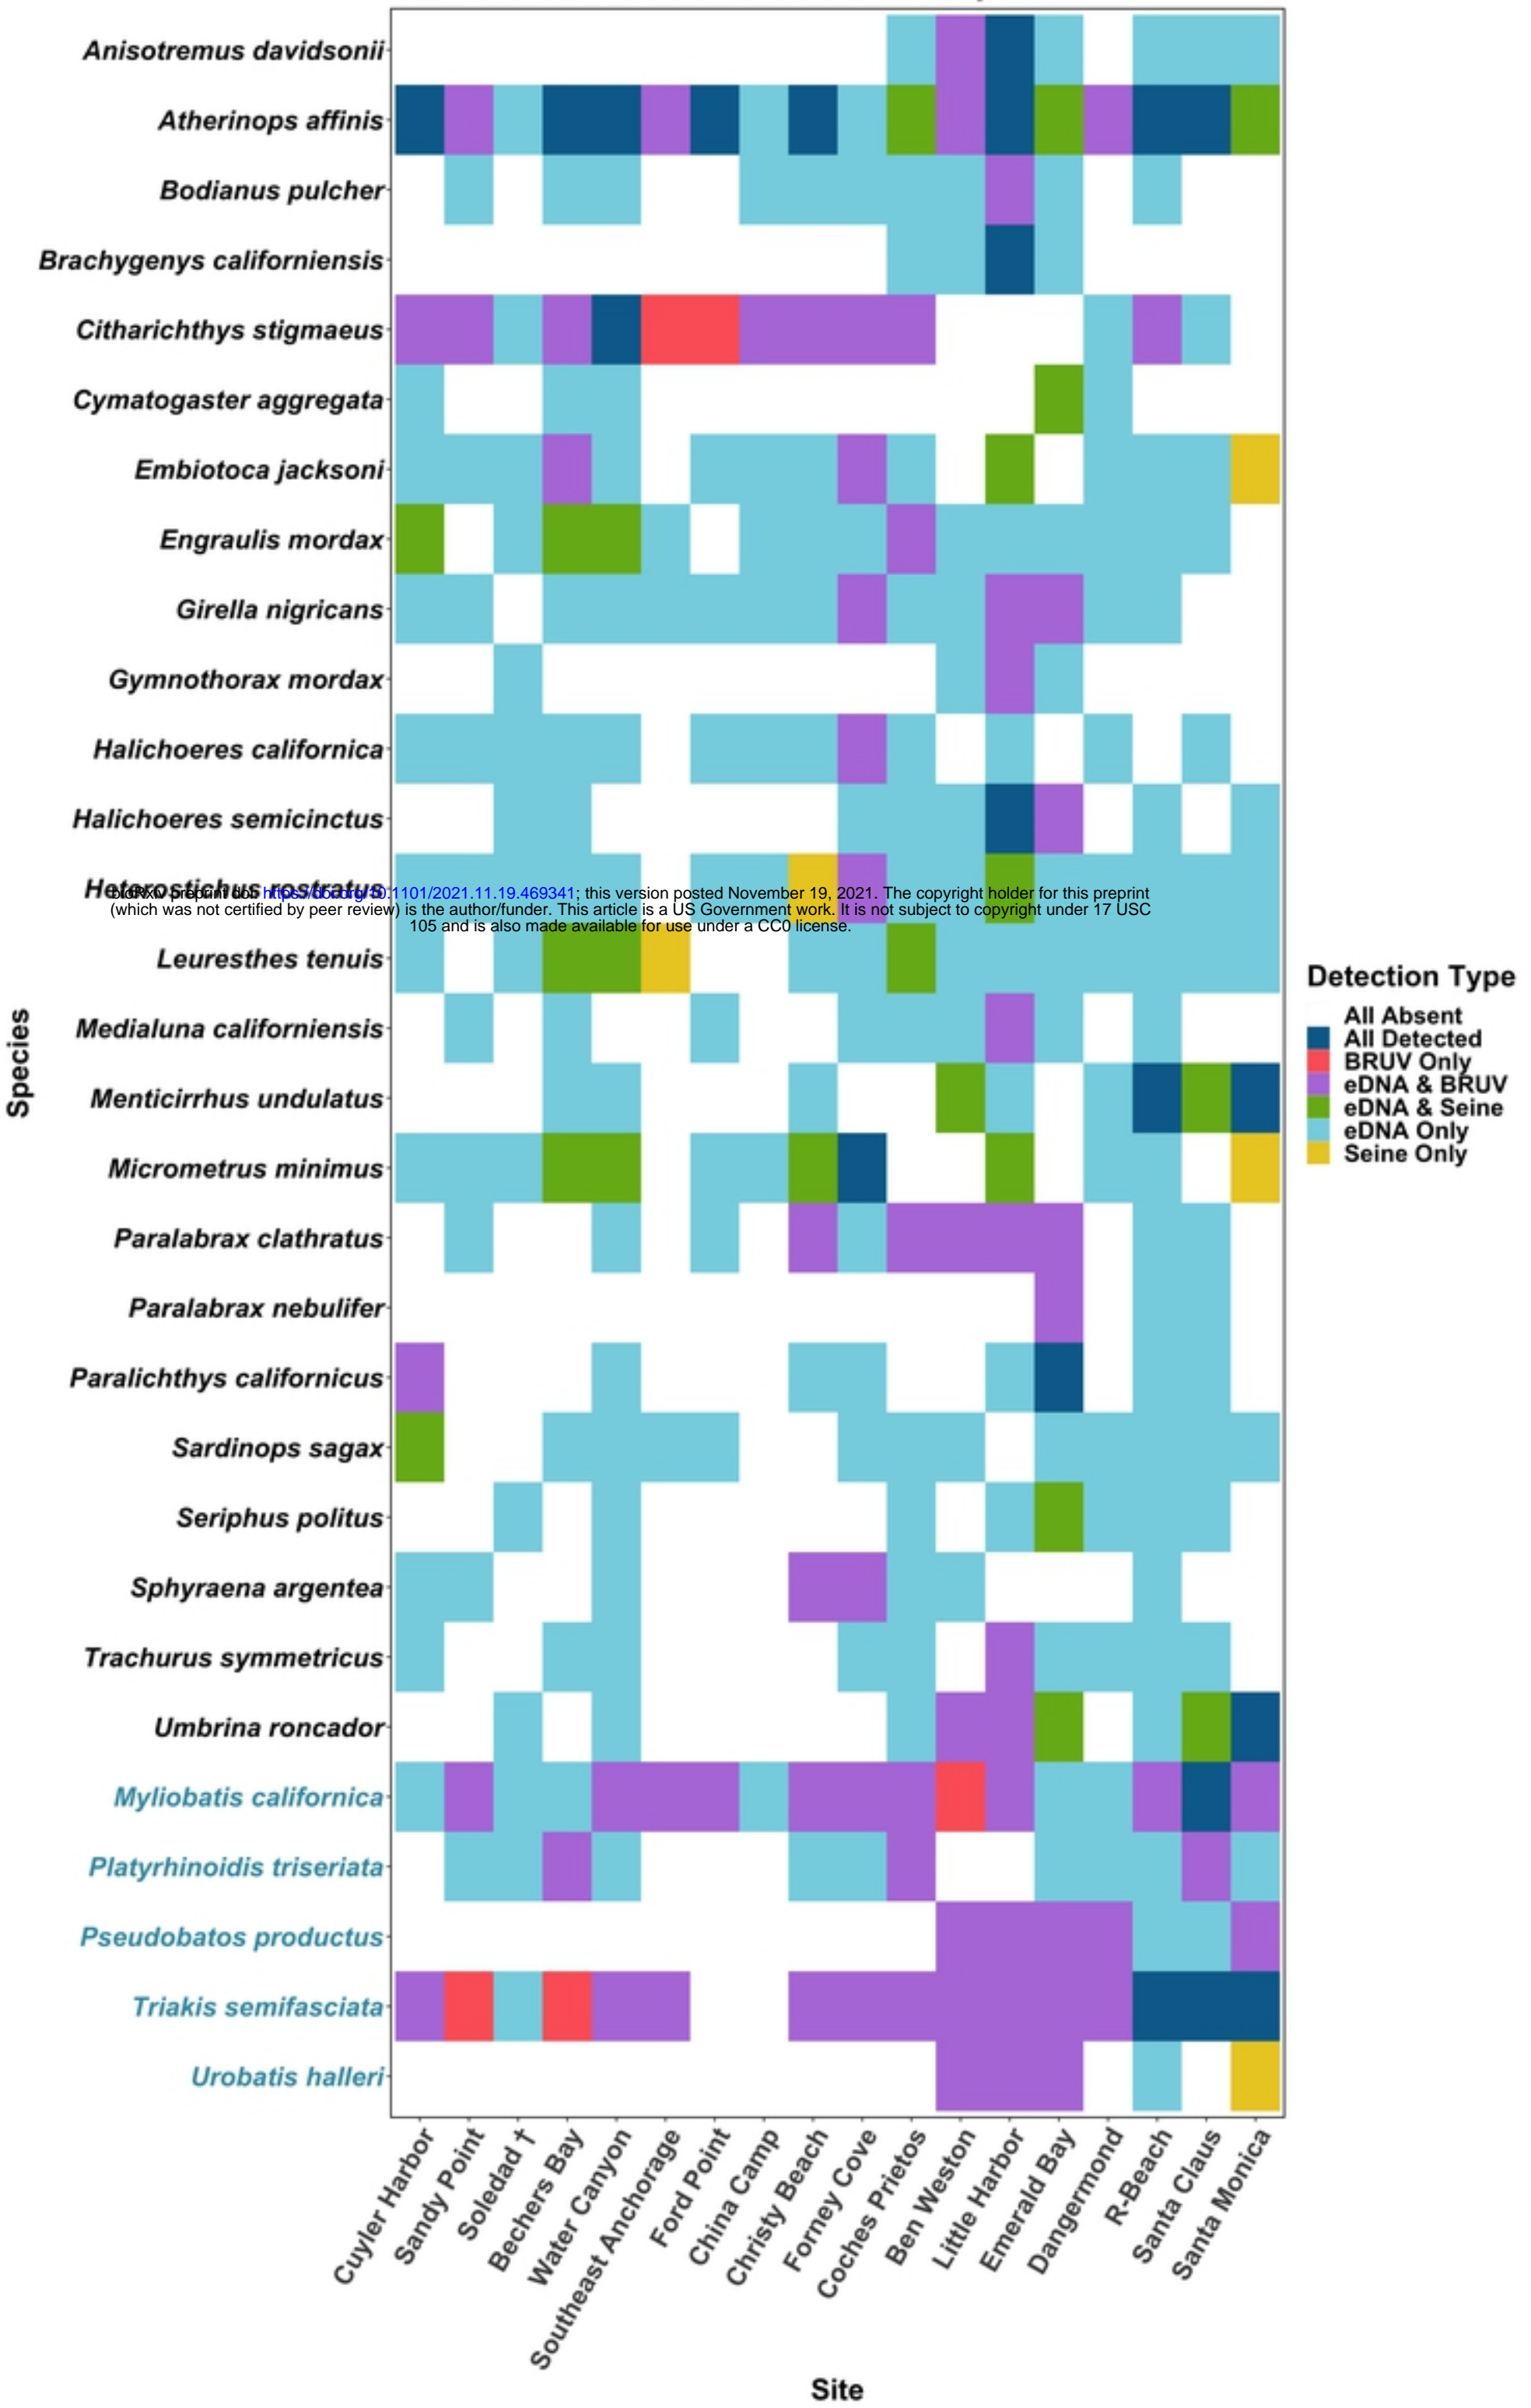

Figure 4

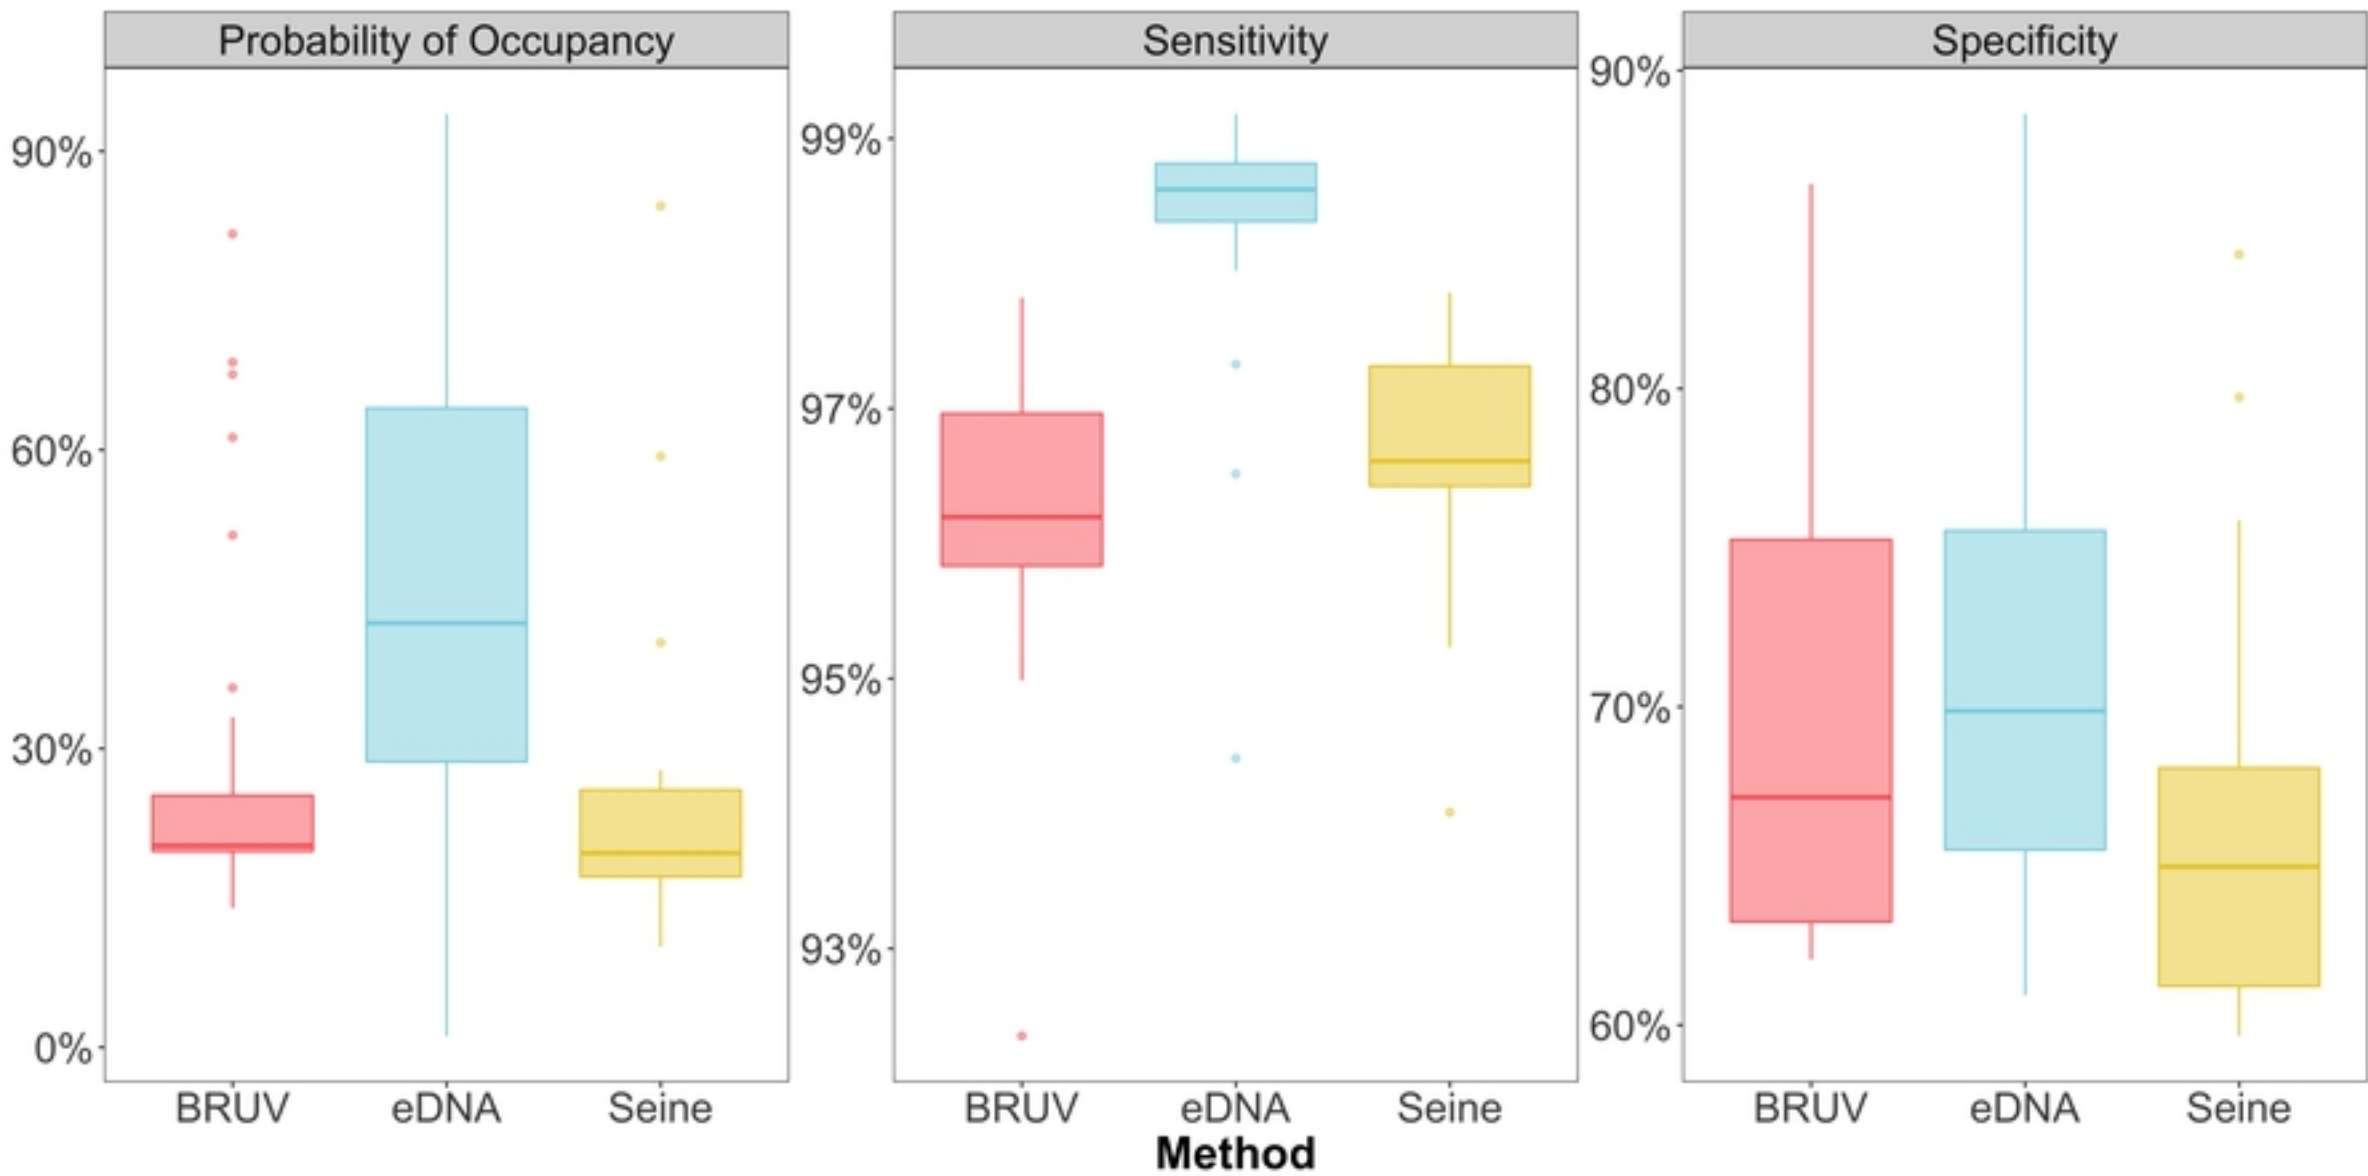

Figure 5

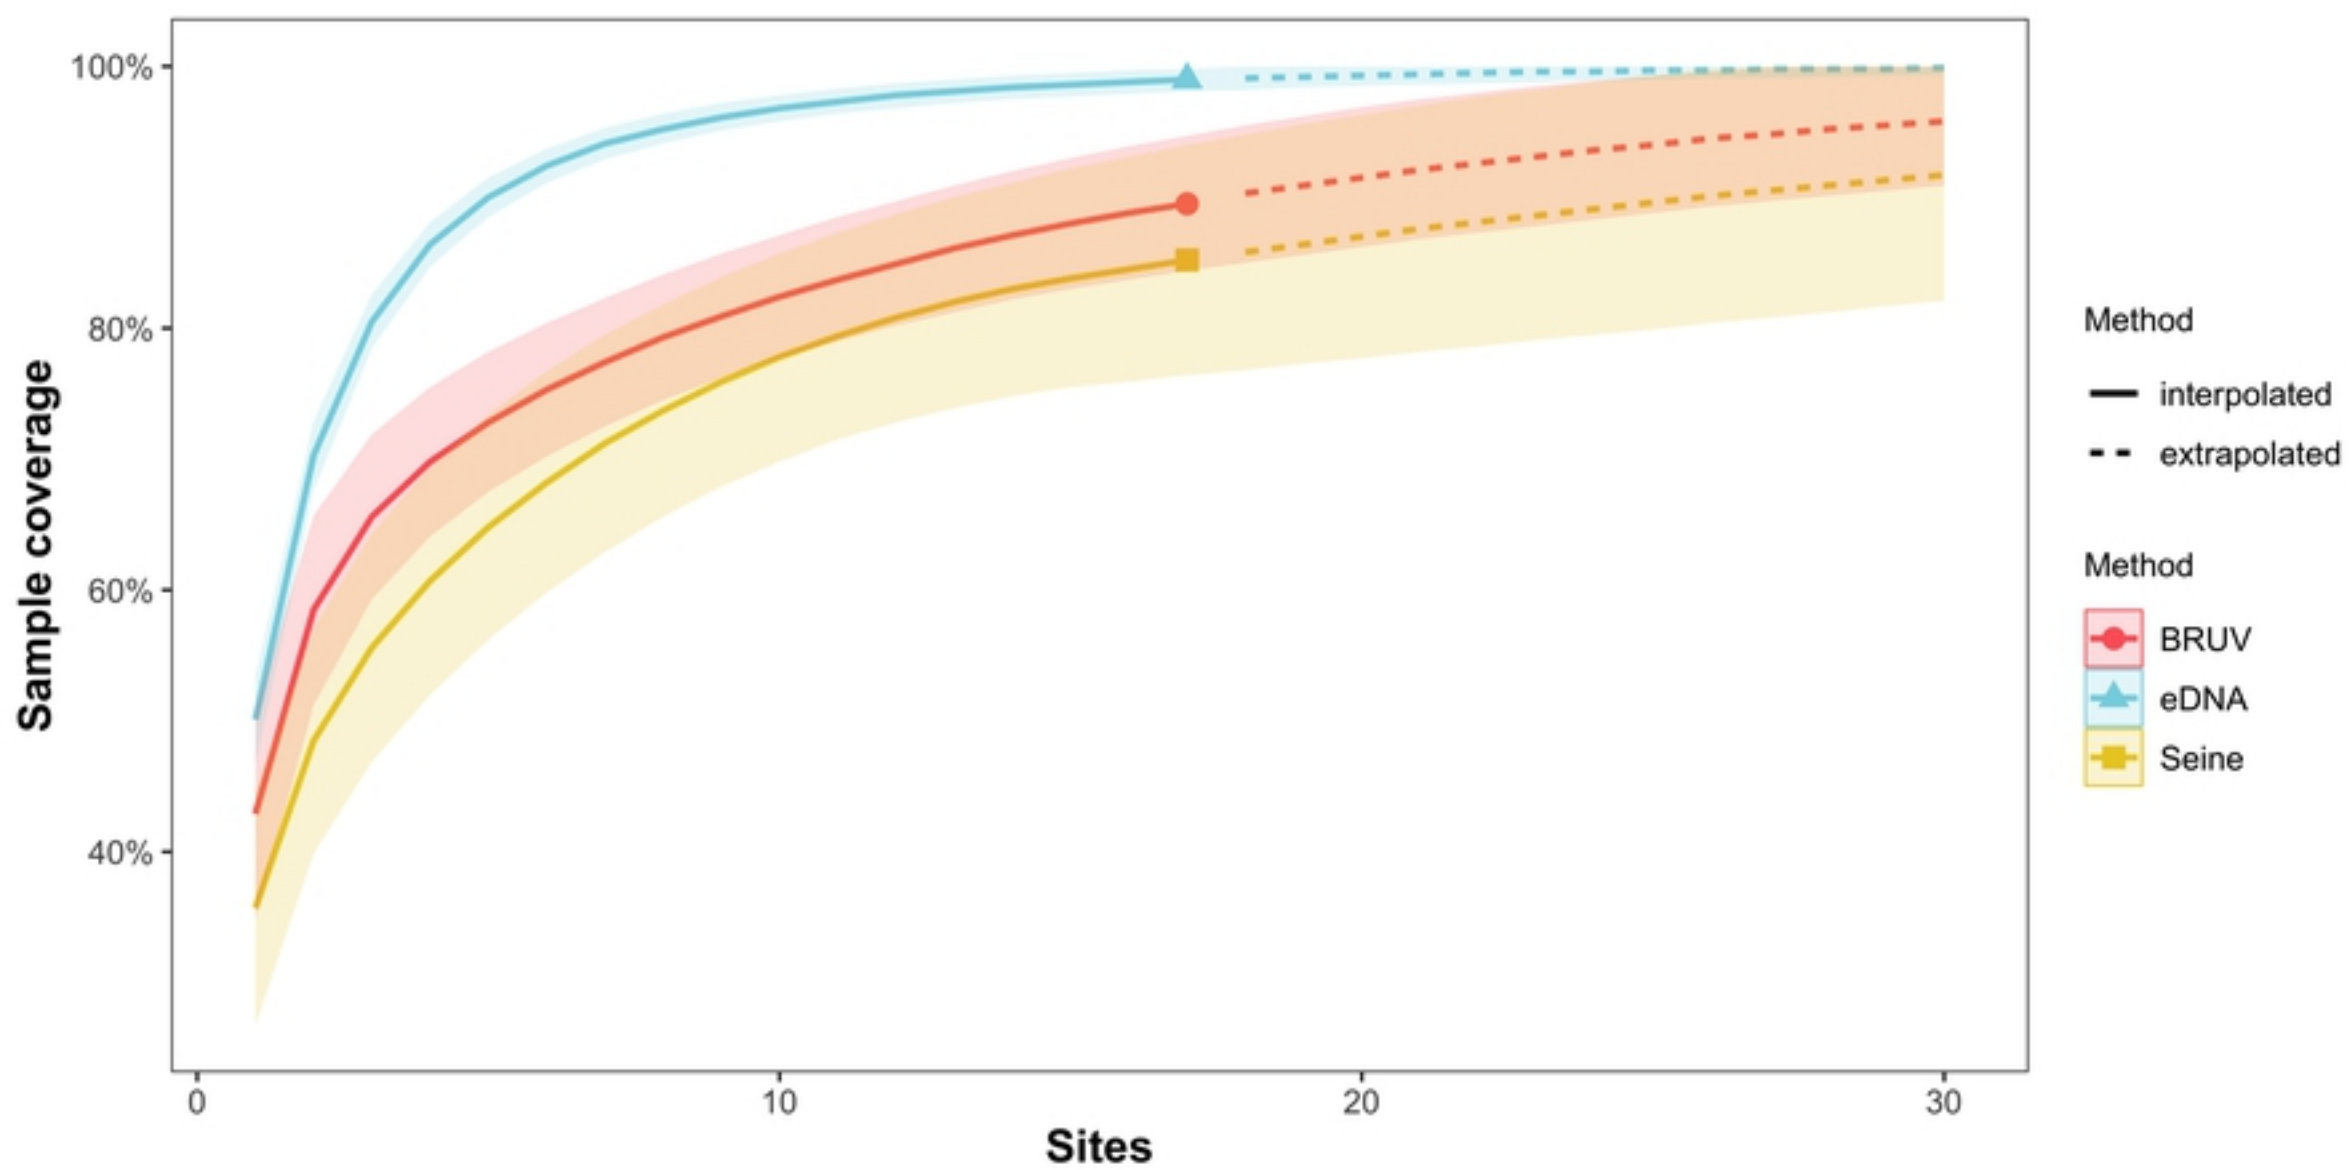

Figure 6
